# Supplementary material for: Predator-Prey Interactions between Shell-Boring Beetle Larvae and Rock-Dwelling Land Snails
Source: PLoS One. 2014 Jun 25;9(6):e100366. doi: 10.1371/journal.pone.0100366 (PMC4070943; doi:10.1371/journal.pone.0100366)
Supplement: Data File S1 — Data Collection Codes: This file contains detailed data on the snail samples, containing Drilus larvae, adults, or exuviae, collected in Greece for this study, as well as on the field localities. Data available from the Dryad Digital Repository:. (XLSX) [file pone.0100366.s003.xlsx]

## Sheet: Voucher numbers
Voucher number	Preservation	Morphospecies	Preserved part / stage/ sex	Prey species	Type of Drilus hole	Collection code	Extra material of same Drilus individual
RMNH.INS.871878	Microscopic slide	-	Skins larva	Rumina cf. saharica	No hole	ERR140901
RMNH.INS.871728	Microscopic slide	E	Skins larva	Rumina cf. saharica	No hole	ERR140901
RMNH.INS.871729	Microscopic slide	E	Skins larva	Rumina cf. saharica	No hole	ERR140901
RMNH.INS.871730	Microscopic slide	E	Skins larva	Helix figulina	No hole	ERR130903
RMNH.INS.871731	Microscopic slide	E	Skins larva	Poiretia dilatata	No hole	ERR200904
RMNH.INS.871697	Microscopic slide	D	Skins larva	Chondrula bergeri	Entry	ERR130903
RMNH.INS.871698	Microscopic slide	D	Skins larva	Lindholmiola lens	Entry	ERR130903
RMNH.INS.871699	Microscopic slide	D	Skins larva	Chondrula bergeri	Entry + exit	ERR130903
RMNH.INS.871700	Microscopic slide	D	Skins larva	Chondrula bergeri	No hole	ERR130903	RMNH.INS.871701
RMNH.INS.871732	Microscopic slide	E	Skins larva	Chondrula bergeri	No hole	ERR130903
RMNH.INS.871702	Microscopic slide	D	Skins larva	Chondrula bergeri	No hole	ERR130903
RMNH.INS.871733	Microscopic slide	E	Skins larva	Chondrula bergeri	No hole	ERR130903
RMNH.INS.871703	Microscopic slide	D	Skins larva and skins pupa	Chondrula bergeri	No hole	ERR130903
RMNH.INS.871704	Microscopic slide	D	Skins larva	Chondrula bergeri	No hole	ERR130903	RMNH.INS.871705
RMNH.INS.871879	Microscopic slide	-	Skins larva	Chondrula bergeri	No hole	ERR130903
RMNH.INS.871880	Microscopic slide	-	Skins larva	Chondrula bergeri	No hole	ERR130903
RMNH.INS.871835	Microscopic slide	Young	Skins larva	Chondrula bergeri	No hole	ERR130903
RMNH.INS.871706	Microscopic slide	D	Skins larva	Chondrula bergeri	No hole	ERR130903
RMNH.INS.871836	Microscopic slide	Young	Skins larva	Albinaria discolor	Entry + exit	ERR150905
RMNH.INS.871837	Microscopic slide	Young	Skins larva	Albinaria discolor	Entry + exit	ERR140905
RMNH.INS.871734	Microscopic slide	E	Skins larva	Lindholmiola lens	No hole	ERR130903
RMNH.INS.871735	Microscopic slide	E	Skins larva	Lindholmiola lens	No hole	ERR130903	RMNH.INS.871736
RMNH.INS.871707	Microscopic slide	D	Skins larva	Lindholmiola lens	No hole	ERR130903
RMNH.INS.871737	Microscopic slide	E	Skins larva	Lindholmiola lens	No hole	ERR130903	RMNH.INS.871738
RMNH.INS.871881	Microscopic slide	-	Skins larva	Rumina cf. saharica	No hole	ERR130903
RMNH.INS.559239	Alcohol	E	Skins larva	Rumina cf. saharica	No hole	ERR130903	RMNH.INS.871739
RMNH.INS.871740	Microscopic slide	E	Skins larva	Rumina cf. saharica	Unknown	ERR140901
RMNH.INS.871741	Microscopic slide	E	Skins larva	Rumina cf. saharica	No hole	ERR140901
RMNH.INS.871742	Microscopic slide	E	Skins larva	Rumina cf. saharica	No hole	ERR140901	RMNH.INS.871743
RMNH.INS.871744	Microscopic slide	E	Skins larva	Rumina cf. saharica	No hole	ERR140901
RMNH.INS.871745	Microscopic slide	E	Skins larva	Rumina cf. saharica	No hole	ERR140901
RMNH.INS.871746	Microscopic slide	E	Skins larva	Rumina cf. saharica	No hole	ERR140901
RMNH.INS.871747	Microscopic slide	E	Skins larva	Rumina cf. saharica	No hole	ERR140901	RMNH.INS.871748
RMNH.INS.871749	Microscopic slide	E	Skins larva	Rumina cf. saharica	No hole	ERR140901	RMNH.INS.871750
RMNH.INS.871751	Microscopic slide	E	Skins larva	Rumina cf. saharica	No hole	ERR140901	RMNH.INS.871752
RMNH.INS.871753	Microscopic slide	E	Skins larva	Rumina cf. saharica	No hole	ERR140901	RMNH.INS.871754
RMNH.INS.871755	Microscopic slide	E	Skins larva	Rumina cf. saharica	No hole	ERR140901
RMNH.INS.871756	Microscopic slide	E	Skins larva	Rumina cf. saharica	No hole	ERR140901	RMNH.INS.871757
RMNH.INS.871758	Microscopic slide	E	Skins larva	Rumina cf. saharica	No hole	ERR140901	RMNH.INS.871759
RMNH.INS.871882	Microscopic slide	-	Skins larva	Rumina cf. saharica	No hole	ERR140901
RMNH.INS.871760	Microscopic slide	E	Skins larva	Rumina cf. saharica	No hole	ERR140901	RMNH.INS.871761
RMNH.INS.559240	Alcohol	E	Skins larva	Rumina cf. saharica	No hole	ERR140901	RMNH.INS.871762
RMNH.INS.871763	Microscopic slide	E	Skins larva	Rumina cf. saharica	No hole	ERR140901	RMNH.INS.871763 & RMNH.INS.871764
RMNH.INS.871766	Microscopic slide	E	Skins larva	Rumina cf. saharica	No hole	ERR140901	RMNH.INS.871767
RMNH.INS.871768	Microscopic slide	E	Skins larva	Rumina cf. saharica	No hole	ERR140901
RMNH.INS.871769	Microscopic slide	E	Skins larva	Rumina cf. saharica	No hole	ERR140901	RMNH.INS.871770 & RMNH.INS.871771
RMNH.INS.871772	Microscopic slide	E	Skins larva	Rumina cf. saharica	No hole	ERR140901
RMNH.INS.871773	Microscopic slide	E	Skins larva	Rumina cf. saharica	Unknown	ERR140901
RMNH.INS.871883	Microscopic slide	-	Skins larva	Rumina cf. saharica	No hole	ERR140903a
RMNH.INS.871774	Microscopic slide	E	Skins larva	Rumina cf. saharica	No hole	ERR140903a
RMNH.INS.871786	Microscopic slide	G	Skins larva	Lindholmiola lens	No hole	ERR100901	RMNH.INS.871787 & RMNH.INS.871788
RMNH.INS.871789	Microscopic slide	G	Skins larva	Chondrula bergeri	No hole	ERR100901	RMNH.INS.871790 & RMNH.INS.871791
RMNH.INS.871792	Microscopic slide	G	Skins larva	Chondrula bergeri	No hole	ERR100901
RMNH.INS.871884	Microscopic slide	-	Skins larva	Lindholmiola lens	No hole	MS03
RMNH.INS.871775	Microscopic slide	E	Skins larva	Lindholmiola lens	No hole	MS03
RMNH.INS.871776	Microscopic slide	E	Skins larva	Lindholmiola lens	No hole	MS03	RMNH.INS.871777
RMNH.INS.871778	Microscopic slide	E	Skins larva	Lindholmiola lens	No hole	MS03
RMNH.INS.871885	Microscopic slide	-	Skins larva	Lindholmiola lens	No hole	ERR150901
RMNH.INS.871886	Microscopic slide	-	Skins larva	Lindholmiola lens	No hole	ERR150901
RMNH.INS.871887	Microscopic slide	-	Skins larva	Lindholmiola lens	No hole	ERR170901
RMNH.INS.871888	Microscopic slide	-	Skins larva	Lindholmiola lens	Entry	MS03
RMNH.INS.871779	Microscopic slide	E	Skins larva	Lindholmiola lens	Unknown	MS03	RMNH.INS.871780 & RMNH.INS.871781
RMNH.INS.871838	Microscopic slide	Young	Skins larva	Albinaria discolor	Entry + exit	ERR150902	RMNH.INS.871839
RMNH.INS.871840	Microscopic slide	Young	Skins larva	Albinaria discolor	Entry + exit	ERR150902	RMNH.INS.871841
RMNH.INS.871806	Microscopic slide	M	Skins larva	Albinaria senilis	Exit	ERR060912
RMNH.INS.871807	Microscopic slide	M	Skins larva	Albinaria senilis	No hole	ERR060912	RMNH.INS.871808
RMNH.INS.871842	Microscopic slide	Young	Skins larva	Albinaria senilis	Entry + exit	ERR060903
RMNH.INS.871809	Microscopic slide	M	Skins larva	Albinaria senilis	Entry + exit	ERR060903
RMNH.INS.871843	Microscopic slide	Young	Skins larva	Albinaria senilis	Exit	ERR040903
RMNH.INS.871889	Microscopic slide	-	Skins larva	Albinaria schuchii	Entry	ERR210905
RMNH.INS.871708	Microscopic slide	D	Skins larva	Albinaria cf. adriani	Exit	MS17	RMNH.INS.871709
RMNH.INS.871890	Microscopic slide	-	Skins larva	Albinaria cf. hohorsti or grisea	Entry + exit	MS17
RMNH.INS.871810	Microscopic slide	M	Skins larva	Albinaria adrianae	Entry + exit	ERR070904
RMNH.INS.871844	Microscopic slide	Young	Skins larva	Albinaria edmundi	Exit	ERR170902	RMNH.INS.871845
RMNH.INS.871793	Microscopic slide	L	Skins larva	Albinaria edmundi	Exit	ERR170902
RMNH.INS.871891	Microscopic slide	-	Skins larva	Albinaria adriani / linnei	Entry + exit	ERR130904
RMNH.INS.871846	Microscopic slide	Young	Skins larva	Albinaria discolor	Entry + exit	ERR160902	RMNH.INS.871847
RMNH.INS.559209	Alcohol	L	Larva	Albinaria discolor	No hole	ERR160902	RMNH.INS.871794
RMNH.INS.559210	Microscopic slide	L	Larva	Albinaria discolor	No hole	ERR150905
RMNH.INS.559211	Alcohol	L	Larva	Albinaria discolor	No hole	ERR140905
RMNH.INS.559241	Dried material	E	Adult male	Rumina cf. saharica	No hole	ERR140901
RMNH.INS.871892	Microscopic slide	-	Skins larva	Mastus pupa	No hole	ERR200901
RMNH.INS.871893	Microscopic slide	-	Skins larva	Chondrula bergeri	No hole	MS17	RMNH.INS.871894 & RMNH.INS.871895
RMNH.INS.871710	Microscopic slide	D	Skins larva	Albinaria cf. adriani	No hole	MS17	RMNH.INS.871711 & RMNH.INS.871712
RMNH.INS.871896	Microscopic slide	-	Skins larva	Albinaria cf. adriani	Entry + exit	MS17
RMNH.INS.871897	Microscopic slide	-	Skins larva	Albinaria cf. adriani	Entry + exit	MS17
RMNH.INS.871898	Microscopic slide	-	Skins larva	Albinaria cf. adriani	Entry + exit	MS17
RMNH.INS.871899	Microscopic slide	-	Skins larva	Albinaria discolor	Entry + exit	ERR150902
RMNH.INS.871900	Microscopic slide	-	Skins larva	Helix figulina	No hole	ERR130903
RMNH.INS.871901	Microscopic slide	-	Skins larva	Lindholmiola lens	No hole	ERR140903b
RMNH.INS.871902	Microscopic slide	-	Skins larva	Lindholmiola lens	No hole	ERR160901
RMNH.INS.871903	Microscopic slide	-	Skins larva	Codringtonia	No hole	ERR020904
RMNH.INS.871713	Microscopic slide	D	Skins larva	Albinaria cf. hohorsti or grisea	Exit	MS17
RMNH.INS.871848	Microscopic slide	Young	Skins larva	Albinaria cf. adriani	Entry + exit	MS17
RMNH.INS.871904	Microscopic slide	-	Skins larva	Albinaria cf. adriani	Entry + exit	MS17
RMNH.INS.871714	Microscopic slide	D	Skins larva	Albinaria cf. adriani	No hole	MS17	RMNH.INS.871715
RMNH.INS.871905	Microscopic slide	-	Skins larva	Albinaria cf. adriani	No hole	MS17
RMNH.INS.871716	Microscopic slide	D	Skins larva	Albinaria cf. hohorsti or grisea	No hole	MS17
RMNH.INS.871795	Microscopic slide	L	Skins larva	Albinaria edmundi	Entry + exit	ERR170903
RMNH.INS.871849	Microscopic slide	Young	Skins larva	Albinaria edmundi	Exit	ERR170903
RMNH.INS.871850	Microscopic slide	Young	Skins larva	Albinaria discolor	Exit	ERR150906
RMNH.INS.871851	Microscopic slide	Young	Skins larva	Albinaria discolor	Exit	ERR160903
RMNH.INS.871906	Microscopic slide	-	Skins larva	Albinaria cf. grisea or petrosa	Entry + exit	MS01
RMNH.INS.871907	Microscopic slide	-	Skins larva	Albinaria cf. grisea or petrosa	Exit	MS01
RMNH.INS.871908	Microscopic slide	-	Skins larva	Albinaria cf. grisea or petrosa	Entry + exit	MS01
RMNH.INS.871909	Microscopic slide	-	Skins larva	Albinaria cf. grisea or petrosa	No hole	MS01
RMNH.INS.871717	Microscopic slide	D	Skins larva	Albinaria litoraria	No hole	MS02
RMNH.INS.871718	Microscopic slide	D	Skins larva	Albinaria litoraria	No hole	MS02
RMNH.INS.871719	Microscopic slide	D	Skins larva	Albinaria litoraria	Exit	MS02
RMNH.INS.871910	Microscopic slide	-	Skins larva	Albinaria litoraria	Entry + exit	MS03
RMNH.INS.871720	Microscopic slide	D	Skins larva	Albinaria litoraria	No hole	MS03	RMNH.INS.871721
RMNH.INS.871911	Microscopic slide	-	Skins larva	Albinaria litoraria	No hole	MS03
RMNH.INS.871722	Microscopic slide	D	Skins larva	Albinaria litoraria	No hole	MS03
RMNH.INS.871782	Microscopic slide	E	Skins larva	Albinaria litoraria	No hole	MS03
RMNH.INS.871723	Microscopic slide	D	Skins larva and skins pupa	Albinaria litoraria	No hole	MS03
RMNH.INS.559222	Dried material	D	Adult male	Albinaria litoraria	No hole	MS03
RMNH.INS.871852	Microscopic slide	Young	Skins larva	Albinaria litoraria	Entry + exit	MS03
RMNH.INS.871724	Microscopic slide	D	Skins larva	Albinaria litoraria	Exit	MS03
RMNH.INS.871725	Microscopic slide	D	Skins larva	Albinaria litoraria	Entry	MS03
RMNH.INS.871726	Microscopic slide	D	Skins larva	Chondrula bergeri	Entry	MS04
RMNH.INS.871853	Microscopic slide	Young	Skins larva	Albinaria discolor	Entry + exit	MS06
RMNH.INS.871912	Microscopic slide	-	Skins larva	Albinaria discolor	No hole	MS06
RMNH.INS.871854	Microscopic slide	Young	Skins larva	Albinaria discolor	Entry + exit	MS06
RMNH.INS.871796	Microscopic slide	L	Skins larva	Albinaria discolor	Entry	MS06
RMNH.INS.871783	Microscopic slide	E	Skins larva	Lindholmiola lens	No hole	MS04
RMNH.INS.871727	Microscopic slide	D	Skins larva	Chondrula bergeri	No hole	MS04
RMNH.INS.871797	Microscopic slide	L	Skins larva and skin pupa	Albinaria discolor	oi	ERR140903b
RMNH.INS.871855	Microscopic slide	Young	Skins larva	Albinaria discolor	Exit	ERR140903b
RMNH.INS.871856	Microscopic slide	Young	Skins larva	Albinaria solicola	Entry + exit	ERR140903b
RMNH.INS.871857	Microscopic slide	Young.	Skins larva	Albinaria edmundi	Entry	MS08
RMNH.INS.871858	Microscopic slide	Young	Skins larva	Albinaria edmundi	Entry	MS08
RMNH.INS.871859	Microscopic slide	Young	Skins larva	Albinaria edmundi	Entry + exit	MS08
RMNH.INS.871860	Microscopic slide	Young	Skins larva	Albinaria argynnis	Entry	MS08
RMNH.INS.871913	Microscopic slide	-	Skins larva	Albinaria edmundi	No hole	MS08
RMNH.INS.871861	Microscopic slide	Young	Skins larva	Albinaria edmundi	No hole	MS08
RMNH.INS.871914	Microscopic slide	-	Skins larva	Albinaria edmundi	Entry	MS08
RMNH.INS.871862	Microscopic slide	Young	Skins larva	Albinaria edmundi	Entry	MS08
RMNH.INS.871863	Microscopic slide	Young	Skins larva	Albinaria edmundi	Entry	ERR170901
RMNH.INS.871864	Microscopic slide	Young	Skins larva	Albinaria edmundi	Entry	MS08
RMNH.INS.871915	Microscopic slide	-	Skins larva	Lindholmiola lens	No hole	ERR120901
RMNH.INS.871784	Microscopic slide	E	Skins larva	Lindholmiola lens	No hole	ERR120901
RMNH.INS.871811	Microscopic slide	M	Skins larva	Albinaria senilis x adrianae	Entry + exit	ERR040902
RMNH.INS.871865	Microscopic slide	Young	Skins larva	Albinaria senilis x adrianae	Exit	ERR060902
RMNH.INS.871866	Microscopic slide	Young	Skins larva	Albinaria senilis x adrianae	Exit	ERR060902
RMNH.INS.871867	Microscopic slide	Young	Skins larva	Albinaria discolor	Entry + exit	ERR140904
RMNH.INS.871868	Microscopic slide	Young	Skins larva	Albinaria discolor	Entry + exit	ERR140904
RMNH.INS.871917	Microscopic slide	-	Skins larva and skins pupa	Albinaria campylauchen	Exit	ERR180901
RMNH.INS.871918	Microscopic slide	-	Skins larva and larva	Albinaria campylauchen	Entry	ERR180901
RMNH.INS.871785	Microscopic slide	E	Skins larva	Albinaria campylauchen	No hole	ERR180901
RMNH.INS.559233	Alcohol	-	Larva	Albinaria campylauchen	Entry	ERR180901
RMNH.INS.871798	Microscopic slide	L	Skins larva	Albinaria campylauchen	unknown	ERR180901
RMNH.INS.871799	Microscopic slide	L	Skins larva	Albinaria campylauchen	Entry	ERR180901
RMNH.INS.871869	Microscopic slide	Young	Skins larva	Albinaria campylauchen	Exit	ERR180901
RMNH.INS.871870	Microscopic slide	Young	Skins larva	Albinaria campylauchen	Exit	ERR180901
RMNH.INS.871919	Microscopic slide	-	Skins larva	Albinaria campylauchen	Entry + exit	ERR180901
RMNH.INS.871871	Microscopic slide	Young	Skins larva	Albinaria campylauchen	Entry + exit	ERR180904
RMNH.INS.871872	Microscopic slide	Young	Skins larva	Albinaria campylauchen	Entry + exit	ERR180904
RMNH.INS.871873	Microscopic slide	Young	Skins larva	Albinaria campylauchen	Entry + exit	ERR180904
RMNH.INS.871874	Microscopic slide	Young	Skins larva	Albinaria campylauchen	Entry + exit	ERR180904
RMNH.INS.871800	Microscopic slide	L	Skins larva	Albinaria campylauchen	Exit	ERR180904
RMNH.INS.871875	Microscopic slide	Young	Skins larva	Albinaria discolor	Entry + exit	ERR180904
RMNH.INS.871876	Microscopic slide	Young	Skins larva	Albinaria campylauchen	Exit	ERR180904
RMNH.INS.871877	Microscopic slide	Young	Skins larva	Albinaria campylauchen	Entry	MS10
RMNH.INS.871920	Microscopic slide	-	Skins larva	Monacha ocellata / syriaca	No hole	ERR060904
RMNH.INS.871801	Microscopic slide	L	Skins larva	Albinaria discolor	No hole	ERR160903
RMNH.INS.559242	Alive - skins in alcohol	M	Larva	Helix sp.	No hole	ERR060913
RMNH.INS.559234	Alcohol	-	Skins larva	Mastus grandis	No hole	ERR070903
RMNH.INS.559228	Alcohol	D	Skins larva	Albinaria adriani / linnei	Entry + exit	MS04
RMNH.INS.559229	Alcohol	D	Skins larva	Albinaria adriani / linnei	Exit	MS04
RMNH.INS.559230	Alcohol	D	Skins larva	Albinaria adriani / linnei	Exit	ERR130903
RMNH.INS.559231	Alcohol	D	Skins larva	Albinaria litoraria	No hole	MS02
RMNH.INS.559232	Alcohol	D	Skins larva	Albinaria adriani / linnei	No hole	MS04
RMNH.INS.559218	Alcohol	G	Larva	Albinaria krueperi	No hole	ERR100901
RMNH.INS.559227	Dried material	L	Larva	Albinaria edmundi	No hole	MS08
RMNH.INS.559237	Alcohol	M	Skins larva	Albinaria senilis	No hole	ERR060904	RMNH.INS.559238
RMNH.INS.559236	Alcohol	M	Skins larva	Albinaria senilis	No hole	ERR060904
RMNH.INS.559235	Alcohol	M	Larva	Albinaria senilis	Unknown	ERR060904
RMNH.INS.559226	Dried material	E	Skins	Albinaria schuchii	No hole	ERR210904
RMNH.INS.559221	Dried material	L	Skins larva, skins pupa and adult male	Albinaria discolor	Entry	ERR140903b

## Sheet: Collection codes
Collection Code	Country	Province/ Island	Exact localition	Latitude	Longitude	Collectors	Collection date
ERR020904	GREECE	Achaia	Megalou Spileou, cliff on the left of the road past the monastery.	38.08585°N	22.17745°E	Baalbergen, E., Helwerda, R.A. & Schelfhorst, R.	2-IX-2011
ERR040902	GREECE	Kefalonia	Chionata, rocks along road.	38.0838°N	20.72308°E	Baalbergen, E., Helwerda, R.A. & Schelfhorst, R.	4-IX-2011
ERR040903	GREECE	Kefalonia	Chionata, rocks along road.	38.0838°N	20.72308°E	Baalbergen, E., Helwerda, R.A. & Schelfhorst, R.	4-IX-2011
ERR060902	GREECE	Kefalonia	Koutsavos, crevice with concrete structure along road.	38.16813°N	20.51263°E	Baalbergen, E., Helwerda, R.A. & Schelfhorst, R.	6-IX-2011
ERR060903	GREECE	Kefalonia	Koutsavos, crevice with concrete structure along road.	38.16813°N	20.51263°E	Baalbergen, E., Helwerda, R.A. & Schelfhorst, R.	6-IX-2011
ERR060904	GREECE	Kefalonia	Koutsavos, crevice with concrete structure along road.	38.16813°N	20.51263°E	Baalbergen, E., Helwerda, R.A. & Schelfhorst, R.	6-IX-2011
ERR060912	GREECE	Kefalonia	Kastro, rocks and walls in and around Aigio Georgio Castle.	38.13736°N	20.55838°E	Baalbergen, E., Helwerda, R.A. & Schelfhorst, R.	6-IX-2011
ERR060913	GREECE	Kefalonia	Kastro, rocks and walls in and around Aigio Georgio Castle.	38.13736°N	20.55838°E	Baalbergen, E., Helwerda, R.A. & Schelfhorst, R.	6-IX-2011
ERR070903	GREECE	Kefalonia	Poros, cliffs along N-side of road through gorge.	38.1494°N	20.76998°E	Baalbergen, E., Helwerda, R.A. & Schelfhorst, R.	7-IX-2011
ERR070904	GREECE	Kefalonia	Poros, cliffs along N-side of road through gorge, broad area sampled.	38.14913°N	20.76938°E	Baalbergen, E., Helwerda, R.A. & Schelfhorst, R.	7-IX-2011
ERR100901	GREECE	Achaia	Taxiarches, rock outcrop along road to Kalogria, opposite wetland.	38.15581°N	21.40285°E	Baalbergen, E., Helwerda, R.A. & Schelfhorst, R.	10-IX-2011
ERR100901	GREECE	Achaia	Taxiarches, rock outcrop along road to Kalogria, opposite wetland.	38.15581°N	21.40285°E	Baalbergen, E., Helwerda, R.A. & Schelfhorst, R.	10-IX-2011
ERR120901	GREECE	Korinthia	Nemea,temple archeological site.	37.80918°N	22.71256°E	Baalbergen, E., Helwerda, R.A. & Schelfhorst, R.	12-IX-2011
ERR130903	GREECE	Arcadia	Koutroufa, rocks along road opposite wetland south of Astros.	37.38381°N	22.74606°E	Baalbergen, E., Helwerda, R.A. & Schelfhorst, R.	13-IX-2011
ERR130904	GREECE	Arcadia	Koutroufa, rocks along road opposite wetland south of Astros.	37.38381°N	22.74606°E	Baalbergen, E., Helwerda, R.A. & Schelfhorst, R.	13-IX-2011
ERR140901	GREECE	Arcadia	Paralio Astros, rocks and walls in and around Paralio Astros, castle.	37.41723°N	22.76945°E	Baalbergen, E., Helwerda, R.A. & Schelfhorst, R.	14-IX-2011
ERR140903a	GREECE	Arcadia	Kiveri-Astros, rocks along road.	37.4454°N	22.74941°E	Baalbergen, E., Helwerda, R.A. & Schelfhorst, R.	14-IX-2011
ERR140903b	GREECE	Arcadia	Agios Andreas-Arcadico Chorio, first 50 m of rockface along road.	37.3371°N	22.7921°E	Baalbergen, E., Helwerda, R.A. & Schelfhorst, R.	14-IX-2011
ERR140904	GREECE	Arcadia	Agios Andreas-Arcadico Chorio, first 50 m of rockface along road.	37.3371°N	22.7921°E	Baalbergen, E., Helwerda, R.A. & Schelfhorst, R.	14-IX-2011
ERR140905	GREECE	Arcadia	Agios Andreas-Arcadico Chorio, first 50 m of rockface along road.	37.3371°N	22.7921°E	Baalbergen, E., Helwerda, R.A. & Schelfhorst, R.	14-IX-2011
ERR150901	GREECE	Arcadia	Agios Andreas-Arcadico Chorio, rockface along road, west of cow sign.	37.33933°N	22.79626°E	Baalbergen, E., Helwerda, R.A. & Schelfhorst, R.	15-IX-2011
ERR150902	GREECE	Arcadia	Agios Andreas-Arcadico Chorio, rockface along road, west of cow sign.	37.33933°N	22.79626°E	Baalbergen, E., Helwerda, R.A. & Schelfhorst, R.	15-IX-2011
ERR150905	GREECE	Arcadia	Agios Andreas-Arcadico Chorio, rockface along road, near eletricity pole.	37.33926°N	22.79565°E	Baalbergen, E., Helwerda, R.A. & Schelfhorst, R.	15-IX-2011
ERR150906	GREECE	Arcadia	Agios Andreas-Arcadico Chorio, rockface along road, near eletricity pole.	37.33926°N	22.79565°E	Baalbergen, E., Helwerda, R.A. & Schelfhorst, R.	15-IX-2011
ERR160901	GREECE	Arcadia	Agios Andreas, ciffs behind farm.	37.33553°N	22.76281°E	Baalbergen, E., Helwerda, R.A. & Schelfhorst, R.	16-IX-2011
ERR160902	GREECE	Arcadia	Agios Andreas, ciffs behind farm.	37.33553°N	22.76281°E	Baalbergen, E., Helwerda, R.A. & Schelfhorst, R.	16-IX-2011
ERR160903	GREECE	Arcadia	Agios Andreas, ciffs behind farm.	37.33553°N	22.76281°E	Baalbergen, E., Helwerda, R.A. & Schelfhorst, R.	16-IX-2011
ERR170901	GREECE	Arcadia	Leonidio, rockface along road in Dafnon gorge west of Leonidio.	37.16283°N	22.8131°E	Baalbergen, E., Helwerda, R.A. & Schelfhorst, R.	17-IX-2011
ERR170902	GREECE	Arcadia	Leonidio, rockface along road in Dafnon gorge west of Leonidio.	37.16283°N	22.8131°E	Baalbergen, E., Helwerda, R.A. & Schelfhorst, R.	17-IX-2011
ERR170903	GREECE	Arcadia	Leonidio, rockface along road in Dafnon gorge west of Leonidio.	37.16283°N	22.8131°E	Baalbergen, E., Helwerda, R.A. & Schelfhorst, R.	17-IX-2011
ERR180901	GREECE	Lakonia	Monemvasia, S-side of rock outcrop.	36.6865°N	23.04891°E	Baalbergen, E., Helwerda, R.A. & Schelfhorst, R.	18-IX-2011
ERR180904	GREECE	Lakonia	Monemvasia, N-side of rock outcrop.	36.6875°N	23.04866°E	Baalbergen, E., Helwerda, R.A. & Schelfhorst, R.	18-IX-2011
ERR200901	GREECE	Lakonia	Gerolimenas, rockface NW of Gerolimenas.	36.48266°N	22.40128°E	Baalbergen, E., Helwerda, R.A. & Schelfhorst, R.	20-IX-2011
ERR210904	GREECE	Lakonia	Lagia, along road, T-crossing.	36.46393°N	22.47553°E	Baalbergen, E., Helwerda, R.A. & Schelfhorst, R.	21-IX-2011
ERR210905	GREECE	Lakonia	Lagia, along road, T-crossing.	36.46393°N	22.47553°E	Baalbergen, E., Helwerda, R.A. & Schelfhorst, R.	21-IX-2011
MS01	GREECE	Arcadia	Between Argos and Astros.	37.5134°N	22.738983°E	Menno Schilthuizen and Sinos Giokas	VII-2011
MS02	GREECE	Arcadia	Near Astros: immediately N of beach N of Astros.	37.456117°N	22.747183°E	Menno Schilthuizen and Sinos Giokas	VII-2011
MS03	GREECE	Arcadia	Paralion Astros: on walls of the castle.	37.417233°N	22.76945°E	Menno Schilthuizen and Sinos Giokas	VII-2011
MS04	GREECE	Arcadia	Koutroufa, rocks along the road at spring.	37.384083°N	22.746183°E	Menno Schilthuizen and Sinos Giokas	VII-2011
MS06	GREECE	Arcadia	Ca. 2 km S of Ag. Andreas rocks along the road.	37.338017°N	22.792917°E	Menno Schilthuizen and Sinos Giokas	VII-2011
MS08	GREECE	Arcadia	Ca. 3 km from Leonidion into the Dafnos-gorge.	37.161567°N	22.812417°E	Menno Schilthuizen and Sinos Giokas	VII-2011
MS10	GREECE	Lakonia	Monemvasia peninsula.	36.686933°N	23.0481°E	Menno Schilthuizen and Sinos Giokas	VII-2011
MS17	GREECE	Argolida	1 km W of Sterna (ca. 25 NW of Nafplio).			Menno Schilthuizen	VIII-2011

## Sheet: Figure 5a,b
ERR130903					MS04					Koutroufa totaal
	-	Young	E	D	-	Young	E	D		-	Young	E	D
Chondrula bergeri	2	1	2	7	0	0	0	2	Chondrula bergeri	2	1	2	9
Helix figulina	1	0	1	0	0	0	0	0	Helix figulina	1	0	1	0
Lindholmiola lens	0	0	3	2	0	0	1	0	Lindholmiola lens	0	0	4	2
Rumina cf. saharica	1	0	1	0	0	0	0	0	Rumina cf. saharica	1	0	1	0
Albinaria adriani / linnei	0	0	0	1	0	0	0	3	Albinaria adriani / linnei	0	0	0	4
ERR140901					MS03					Paralion Astros totaal
	-	Young	E	D	-	Young	E	D		-	Young	E	D
Lindholmiola lens	0	0	0	0	2	0	4	0	Lindholmiola lens	2	0	4	0
Rumina cf. saharica	2	0	24	0	0	0	0	0	Rumina cf. saharica	2	0	24	0
Albinaria litoraria	0	0	0	0	2	1	1	6	Albinaria litoraria	2	1	1	6
