# Supplementary material for: Predator-Prey Interactions between Shell-Boring Beetle Larvae and Rock-Dwelling Land Snails
Source: PLoS One. 2014 Jun 25;9(6):e100366. doi: 10.1371/journal.pone.0100366 (PMC4070943; doi:10.1371/journal.pone.0100366)
Supplement: Data File S2 — Data Voucher Numbers: This file contains detailed information on all Drilus specimens used for this study. Data available from the Dryad Digital Repository:. (XLSX) [file pone.0100366.s004.xlsx]

## Sheet: Voucher numbers
Voucher number	RMNH		Morphospecies	Preserved part / stage/ sex	Prey species	Type of Drilus hole	Collection code	Extra material of same Drilus individual
EB2013-001	RMNH.INS.871878	Microscopic slide	-	Skins larva	Rumina cf. saharica	No hole	ERR140901
EB2013-002	RMNH.INS.871728	Microscopic slide	E	Skins larva	Rumina cf. saharica	No hole	ERR140901
EB2013-007	RMNH.INS.871729	Microscopic slide	E	Skins larva	Rumina cf. saharica	No hole	ERR140901
EB2013-012	RMNH.INS.871730	Microscopic slide	E	Skins larva	Helix figulina	No hole	ERR130903
EB2013-013	RMNH.INS.871731	Microscopic slide	E	Skins larva	Poiretia dilatata	No hole	ERR200904
EB2013-016	RMNH.INS.871697	Microscopic slide	D	Skins larva	Chondrula bergeri	Entry	ERR130903
EB2013-017	RMNH.INS.871698	Microscopic slide	D	Skins larva	Lindholmiola lens	Entry	ERR130903
EB2013-019	RMNH.INS.871699	Microscopic slide	D	Skins larva	Chondrula bergeri	Entry + exit	ERR130903
EB2013-020	RMNH.INS.871700	Microscopic slide	D	Skins larva	Chondrula bergeri	No hole	ERR130903	EB2013-021	RMNH.INS.871701
EB2013-022	RMNH.INS.871732	Microscopic slide	E	Skins larva	Chondrula bergeri	No hole	ERR130903
EB2013-023	RMNH.INS.871702	Microscopic slide	D	Skins larva	Chondrula bergeri	No hole	ERR130903
EB2013-024	RMNH.INS.871733	Microscopic slide	E	Skins larva	Chondrula bergeri	No hole	ERR130903
EB2013-025	RMNH.INS.871703	Microscopic slide	D	Skins larva and skins pupa	Chondrula bergeri	No hole	ERR130903
EB2013-026	RMNH.INS.871704	Microscopic slide	D	Skins larva	Chondrula bergeri	No hole	ERR130903	EB2013-027	RMNH.INS.871705
EB2013-029	RMNH.INS.871879	Microscopic slide	-	Skins larva	Chondrula bergeri	No hole	ERR130903
EB2013-030	RMNH.INS.871880	Microscopic slide	-	Skins larva	Chondrula bergeri	No hole	ERR130903
EB2013-031	RMNH.INS.871835	Microscopic slide	Young	Skins larva	Chondrula bergeri	No hole	ERR130903
EB2013-032	RMNH.INS.871706	Microscopic slide	D	Skins larva	Chondrula bergeri	No hole	ERR130903
EB2013-033	RMNH.INS.871836	Microscopic slide	Young	Skins larva	Albinaria discolor	Entry + exit	ERR150905
EB2013-034	RMNH.INS.871837	Microscopic slide	Young	Skins larva	Albinaria discolor	Entry + exit	ERR140905
EB2013-035	RMNH.INS.871734	Microscopic slide	E	Skins larva	Lindholmiola lens	No hole	ERR130903
EB2013-037	RMNH.INS.871735	Microscopic slide	E	Skins larva	Lindholmiola lens	No hole	ERR130903	EB2013-038	RMNH.INS.871736
EB2013-040	RMNH.INS.871707	Microscopic slide	D	Skins larva	Lindholmiola lens	No hole	ERR130903
EB2013-041	RMNH.INS.871737	Microscopic slide	E	Skins larva	Lindholmiola lens	No hole	ERR130903	EB2013-042	RMNH.INS.871738
EB2013-043	RMNH.INS.871881	Microscopic slide	-	Skins larva	Rumina cf. saharica	No hole	ERR130903
EB2013-044	RMNH.INS.559239	Alcohol	E	Skins larva	Rumina cf. saharica	No hole	ERR130903	EB2013-045	RMNH.INS.871739
EB2013-048	RMNH.INS.871740	Microscopic slide	E	Skins larva	Rumina cf. saharica	Unknown	ERR140901
EB2013-049	RMNH.INS.871741	Microscopic slide	E	Skins larva	Rumina cf. saharica	No hole	ERR140901
EB2013-050	RMNH.INS.871742	Microscopic slide	E	Skins larva	Rumina cf. saharica	No hole	ERR140901	EB2013-051	RMNH.INS.871743
EB2013-052	RMNH.INS.871744	Microscopic slide	E	Skins larva	Rumina cf. saharica	No hole	ERR140901
EB2013-053	RMNH.INS.871745	Microscopic slide	E	Skins larva	Rumina cf. saharica	No hole	ERR140901
EB2013-054	RMNH.INS.871746	Microscopic slide	E	Skins larva	Rumina cf. saharica	No hole	ERR140901
EB2013-058	RMNH.INS.871747	Microscopic slide	E	Skins larva	Rumina cf. saharica	No hole	ERR140901	EB2013-059	RMNH.INS.871748
EB2013-060	RMNH.INS.871749	Microscopic slide	E	Skins larva	Rumina cf. saharica	No hole	ERR140901	EB2013-061	RMNH.INS.871750
EB2013-062	RMNH.INS.871751	Microscopic slide	E	Skins larva	Rumina cf. saharica	No hole	ERR140901	EB2013-063	RMNH.INS.871752
EB2013-064	RMNH.INS.871753	Microscopic slide	E	Skins larva	Rumina cf. saharica	No hole	ERR140901	EB2013-065	RMNH.INS.871754
EB2013-066	RMNH.INS.871755	Microscopic slide	E	Skins larva	Rumina cf. saharica	No hole	ERR140901
EB2013-067	RMNH.INS.871756	Microscopic slide	E	Skins larva	Rumina cf. saharica	No hole	ERR140901	EB2013-068	RMNH.INS.871757
EB2013-069	RMNH.INS.871758	Microscopic slide	E	Skins larva	Rumina cf. saharica	No hole	ERR140901	EB2013-070	RMNH.INS.871759
EB2013-071	RMNH.INS.871882	Microscopic slide	-	Skins larva	Rumina cf. saharica	No hole	ERR140901
EB2013-072	RMNH.INS.871760	Microscopic slide	E	Skins larva	Rumina cf. saharica	No hole	ERR140901	EB2013-073	RMNH.INS.871761
EB2013-074	RMNH.INS.559240	Alcohol	E	Skins larva	Rumina cf. saharica	No hole	ERR140901	EB2013-075	RMNH.INS.871762
EB2013-078	RMNH.INS.871763	Microscopic slide	E	Skins larva	Rumina cf. saharica	No hole	ERR140901	EB2013-078 & EB2013-079	RMNH.INS.871763 & RMNH.INS.871764
EB2013-081	RMNH.INS.871766	Microscopic slide	E	Skins larva	Rumina cf. saharica	No hole	ERR140901	EB2013-082	RMNH.INS.871767
EB2013-083	RMNH.INS.871768	Microscopic slide	E	Skins larva	Rumina cf. saharica	No hole	ERR140901
EB2013-084	RMNH.INS.871769	Microscopic slide	E	Skins larva	Rumina cf. saharica	No hole	ERR140901	EB2013-085 & EB2013-086	RMNH.INS.871770 & RMNH.INS.871771
EB2013-087	RMNH.INS.871772	Microscopic slide	E	Skins larva	Rumina cf. saharica	No hole	ERR140901
EB2013-088	RMNH.INS.871773	Microscopic slide	E	Skins larva	Rumina cf. saharica	Unknown	ERR140901
EB2013-090	RMNH.INS.871883	Microscopic slide	-	Skins larva	Rumina cf. saharica	No hole	ERR140903a
EB2013-091	RMNH.INS.871774	Microscopic slide	E	Skins larva	Rumina cf. saharica	No hole	ERR140903a
EB2013-094	RMNH.INS.871786	Microscopic slide	G	Skins larva	Lindholmiola lens	No hole	ERR100901	EB2013-095 & EB2013-096	RMNH.INS.871787 & RMNH.INS.871788
EB2013-097	RMNH.INS.871789	Microscopic slide	G	Skins larva	Chondrula bergeri	No hole	ERR100901	EB2013-098 & EB2013-099	RMNH.INS.871790 & RMNH.INS.871791
EB2013-100	RMNH.INS.871792	Microscopic slide	G	Skins larva	Chondrula bergeri	No hole	ERR100901
EB2013-101	RMNH.INS.871884	Microscopic slide	-	Skins larva	Lindholmiola lens	No hole	MS03
EB2013-102	RMNH.INS.871775	Microscopic slide	E	Skins larva	Lindholmiola lens	No hole	MS03
EB2013-103	RMNH.INS.871776	Microscopic slide	E	Skins larva	Lindholmiola lens	No hole	MS03	EB2013-104	RMNH.INS.871777
EB2013-105	RMNH.INS.871778	Microscopic slide	E	Skins larva	Lindholmiola lens	No hole	MS03
EB2013-108	RMNH.INS.871885	Microscopic slide	-	Skins larva	Lindholmiola lens	No hole	ERR150901
EB2013-109	RMNH.INS.871886	Microscopic slide	-	Skins larva	Lindholmiola lens	No hole	ERR150901
EB2013-110	RMNH.INS.871887	Microscopic slide	-	Skins larva	Lindholmiola lens	No hole	ERR170901
EB2013-111	RMNH.INS.871888	Microscopic slide	-	Skins larva	Lindholmiola lens	Entry	MS03
EB2013-112	RMNH.INS.871779	Microscopic slide	E	Skins larva	Lindholmiola lens	Unknown	MS03	EB2013-113 & EB2013-114	RMNH.INS.871780 & RMNH.INS.871781
EB2013-115	RMNH.INS.871838	Microscopic slide	Young	Skins larva	Albinaria discolor	Entry + exit	ERR150902	EB2013-116	RMNH.INS.871839
EB2013-117	RMNH.INS.871840	Microscopic slide	Young	Skins larva	Albinaria discolor	Entry + exit	ERR150902	EB2013-118	RMNH.INS.871841
EB2013-119	RMNH.INS.871806	Microscopic slide	M	Skins larva	Albinaria senilis	Exit	ERR060912
EB2013-120	RMNH.INS.871807	Microscopic slide	M	Skins larva	Albinaria senilis	No hole	ERR060912	EB2013-121	RMNH.INS.871808
EB2013-122	RMNH.INS.871842	Microscopic slide	Young	Skins larva	Albinaria senilis	Entry + exit	ERR060903
EB2013-123	RMNH.INS.871809	Microscopic slide	M	Skins larva	Albinaria senilis	Entry + exit	ERR060903
EB2013-126	RMNH.INS.871843	Microscopic slide	Young	Skins larva	Albinaria senilis	Exit	ERR040903
EB2013-128	RMNH.INS.871889	Microscopic slide	-	Skins larva	Albinaria schuchii	Entry	ERR210905
EB2013-129	RMNH.INS.871708	Microscopic slide	D	Skins larva	Albinaria cf. adriani	Exit	MS17	EB2013-130	RMNH.INS.871709
EB2013-131	RMNH.INS.871890	Microscopic slide	-	Skins larva	Albinaria cf. hohorsti or grisea	Entry + exit	MS17
EB2013-132	RMNH.INS.871810	Microscopic slide	M	Skins larva	Albinaria adrianae	Entry + exit	ERR070904
EB2013-133	RMNH.INS.871844	Microscopic slide	Young	Skins larva	Albinaria edmundi	Exit	ERR170902	EB2013-134	RMNH.INS.871845
EB2013-135	RMNH.INS.871793	Microscopic slide	L	Skins larva	Albinaria edmundi	Exit	ERR170902
EB2013-136	RMNH.INS.871891	Microscopic slide	-	Skins larva	Albinaria adriani / linnei	Entry + exit	ERR130904
EB2013-137	RMNH.INS.871846	Microscopic slide	Young	Skins larva	Albinaria discolor	Entry + exit	ERR160902	EB2013-138	RMNH.INS.871847
EB2013-139	RMNH.INS.559223	Alcohol	L	Larva	Albinaria discolor	No hole	ERR160902	EB2013-140	RMNH.INS.871794
EB2013-141	RMNH.INS.559224	Microscopic slide	L	Larva	Albinaria discolor	No hole	ERR150905
EB2013-142	RMNH.INS.559225	Alcohol	L	Larva	Albinaria discolor	No hole	ERR140905
EB2013-143	RMNH.INS.559241	Dried material	E	Adult male	Rumina cf. saharica	No hole	ERR140901
EB2013-144	RMNH.INS.871892	Microscopic slide	-	Skins larva	Mastus pupa	No hole	ERR200901
EB2013-146	RMNH.INS.871893	Microscopic slide	-	Skins larva	Chondrula bergeri	No hole	MS17	EB2013-147 & EB2013-148	RMNH.INS.871894 & RMNH.INS.871895
EB2013-150	RMNH.INS.871710	Microscopic slide	D	Skins larva	Albinaria cf. adriani	No hole	MS17	EB2013-151 & EB2013-152	RMNH.INS.871711 & RMNH.INS.871712
EB2013-153	RMNH.INS.871896	Microscopic slide	-	Skins larva	Albinaria cf. adriani	Entry + exit	MS17
EB2013-156	RMNH.INS.871897	Microscopic slide	-	Skins larva	Albinaria cf. adriani	Entry + exit	MS17
EB2013-158	RMNH.INS.871898	Microscopic slide	-	Skins larva	Albinaria cf. adriani	Entry + exit	MS17
EB2013-159	RMNH.INS.871899	Microscopic slide	-	Skins larva	Albinaria discolor	Entry + exit	ERR150902
EB2013-162	RMNH.INS.871900	Microscopic slide	-	Skins larva	Helix figulina	No hole	ERR130903
EB2013-163	RMNH.INS.871901	Microscopic slide	-	Skins larva	Lindholmiola lens	No hole	ERR140903b
EB2013-169	RMNH.INS.871902	Microscopic slide	-	Skins larva	Lindholmiola lens	No hole	ERR160901
EB2013-170	RMNH.INS.871903	Microscopic slide	-	Skins larva	Codringtonia	No hole	ERR020904
EB2013-172	RMNH.INS.871713	Microscopic slide	D	Skins larva	Albinaria cf. hohorsti or grisea	Exit	MS17
EB2013-173	RMNH.INS.871848	Microscopic slide	Young	Skins larva	Albinaria cf. adriani	Entry + exit	MS17
EB2013-174	RMNH.INS.871904	Microscopic slide	-	Skins larva	Albinaria cf. adriani	Entry + exit	MS17
EB2013-175	RMNH.INS.871714	Microscopic slide	D	Skins larva	Albinaria cf. adriani	No hole	MS17	EB2013-176	RMNH.INS.871715
EB2013-177	RMNH.INS.871905	Microscopic slide	-	Skins larva	Albinaria cf. adriani	No hole	MS17
EB2013-178	RMNH.INS.871716	Microscopic slide	D	Skins larva	Albinaria cf. hohorsti or grisea	No hole	MS17
EB2013-179	RMNH.INS.871795	Microscopic slide	L	Skins larva	Albinaria edmundi	Entry + exit	ERR170903
EB2013-180	RMNH.INS.871849	Microscopic slide	Young	Skins larva	Albinaria edmundi	Exit	ERR170903
EB2013-181	RMNH.INS.871850	Microscopic slide	Young	Skins larva	Albinaria discolor	Exit	ERR150906
EB2013-186	RMNH.INS.871851	Microscopic slide	Young	Skins larva	Albinaria discolor	Exit	ERR160903
EB2013-187	RMNH.INS.871906	Microscopic slide	-	Skins larva	Albinaria cf. grisea or petrosa	Entry + exit	MS01
EB2013-188	RMNH.INS.871907	Microscopic slide	-	Skins larva	Albinaria cf. grisea or petrosa	Exit	MS01
EB2013-189	RMNH.INS.871908	Microscopic slide	-	Skins larva	Albinaria cf. grisea or petrosa	Entry + exit	MS01
EB2013-190	RMNH.INS.871909	Microscopic slide	-	Skins larva	Albinaria cf. grisea or petrosa	No hole	MS01
EB2013-191	RMNH.INS.871717	Microscopic slide	D	Skins larva	Albinaria litoraria	No hole	MS02
EB2013-192	RMNH.INS.871718	Microscopic slide	D	Skins larva	Albinaria litoraria	No hole	MS02
EB2013-193	RMNH.INS.871719	Microscopic slide	D	Skins larva	Albinaria litoraria	Exit	MS02
EB2013-194	RMNH.INS.871910	Microscopic slide	-	Skins larva	Albinaria litoraria	Entry + exit	MS03
EB2013-195	RMNH.INS.871720	Microscopic slide	D	Skins larva	Albinaria litoraria	No hole	MS03	EB2013-196	RMNH.INS.871721
EB2013-197	RMNH.INS.871911	Microscopic slide	-	Skins larva	Albinaria litoraria	No hole	MS03
EB2013-198	RMNH.INS.871722	Microscopic slide	D	Skins larva	Albinaria litoraria	No hole	MS03
EB2013-199	RMNH.INS.871782	Microscopic slide	E	Skins larva	Albinaria litoraria	No hole	MS03
EB2013-200	RMNH.INS.871723	Microscopic slide	D	Skins larva and skins pupa	Albinaria litoraria	No hole	MS03
EB2013-201	RMNH.INS.559222	Dried material	D	Adult male	Albinaria litoraria	No hole	MS03
EB2013-202	RMNH.INS.871852	Microscopic slide	Young	Skins larva	Albinaria litoraria	Entry + exit	MS03
EB2013-203	RMNH.INS.871724	Microscopic slide	D	Skins larva	Albinaria litoraria	Exit	MS03
EB2013-204	RMNH.INS.871725	Microscopic slide	D	Skins larva	Albinaria litoraria	Entry	MS03
EB2013-205	RMNH.INS.871726	Microscopic slide	D	Skins larva	Chondrula bergeri	Entry	MS04
EB2013-206	RMNH.INS.871853	Microscopic slide	Young	Skins larva	Albinaria discolor	Entry + exit	MS06
EB2013-207	RMNH.INS.871912	Microscopic slide	-	Skins larva	Albinaria discolor	No hole	MS06
EB2013-208	RMNH.INS.871854	Microscopic slide	Young	Skins larva	Albinaria discolor	Entry + exit	MS06
EB2013-209	RMNH.INS.871796	Microscopic slide	L	Skins larva	Albinaria discolor	Entry	MS06
EB2013-210	RMNH.INS.871783	Microscopic slide	E	Skins larva	Lindholmiola lens	No hole	MS04
EB2013-211	RMNH.INS.871727	Microscopic slide	D	Skins larva	Chondrula bergeri	No hole	MS04
EB2013-212	RMNH.INS.871797	Microscopic slide	L	Skins larva and skin pupa	Albinaria discolor	oi	ERR140903b
EB2013-213	RMNH.INS.871855	Microscopic slide	Young	Skins larva	Albinaria discolor	Exit	ERR140903b
EB2013-222	RMNH.INS.871856	Microscopic slide	Young	Skins larva	Albinaria solicola	Entry + exit	ERR140903b
EB2013-223	RMNH.INS.871857	Microscopic slide	Young.	Skins larva	Albinaria edmundi	Entry	MS08
EB2013-224	RMNH.INS.871858	Microscopic slide	Young	Skins larva	Albinaria edmundi	Entry	MS08
EB2013-225	RMNH.INS.871859	Microscopic slide	Young	Skins larva	Albinaria edmundi	Entry + exit	MS08
EB2013-226	RMNH.INS.871860	Microscopic slide	Young	Skins larva	Albinaria argynnis	Entry	MS08
EB2013-227	RMNH.INS.871913	Microscopic slide	-	Skins larva	Albinaria edmundi	No hole	MS08
EB2013-228	RMNH.INS.871861	Microscopic slide	Young	Skins larva	Albinaria edmundi	No hole	MS08
EB2013-229	RMNH.INS.871914	Microscopic slide	-	Skins larva	Albinaria edmundi	Entry	MS08
EB2013-230	RMNH.INS.871862	Microscopic slide	Young	Skins larva	Albinaria edmundi	Entry	MS08
EB2013-231	RMNH.INS.871863	Microscopic slide	Young	Skins larva	Albinaria edmundi	Entry	ERR170901
EB2013-232	RMNH.INS.871864	Microscopic slide	Young	Skins larva	Albinaria edmundi	Entry	MS08
EB2013-233	RMNH.INS.871915	Microscopic slide	-	Skins larva	Lindholmiola lens	No hole	ERR120901
EB2013-234	RMNH.INS.871784	Microscopic slide	E	Skins larva	Lindholmiola lens	No hole	ERR120901
EB2013-244	RMNH.INS.871811	Microscopic slide	M	Skins larva	Albinaria senilis x adrianae	Entry + exit	ERR040902
EB2013-245	RMNH.INS.871865	Microscopic slide	Young	Skins larva	Albinaria senilis x adrianae	Exit	ERR060902
EB2013-246	RMNH.INS.871866	Microscopic slide	Young	Skins larva	Albinaria senilis x adrianae	Exit	ERR060902
EB2013-247	RMNH.INS.871867	Microscopic slide	Young	Skins larva	Albinaria discolor	Entry + exit	ERR140904
EB2013-249	RMNH.INS.871868	Microscopic slide	Young	Skins larva	Albinaria discolor	Entry + exit	ERR140904
EB2013-250	RMNH.INS.871917	Microscopic slide	-	Skins larva and skins pupa	Albinaria campylauchen	Exit	ERR180901
EB2013-257	RMNH.INS.871918	Microscopic slide	-	Skins larva and larva	Albinaria campylauchen	Entry	ERR180901
EB2013-258	RMNH.INS.871785	Microscopic slide	E	Skins larva	Albinaria campylauchen	No hole	ERR180901
EB2013-259	RMNH.INS.559233	Alcohol	-	Larva	Albinaria campylauchen	Entry	ERR180901
EB2013-260	RMNH.INS.871798	Microscopic slide	L	Skins larva	Albinaria campylauchen	unknown	ERR180901
EB2013-261	RMNH.INS.871799	Microscopic slide	L	Skins larva	Albinaria campylauchen	Entry	ERR180901
EB2013-262	RMNH.INS.871869	Microscopic slide	Young	Skins larva	Albinaria campylauchen	Exit	ERR180901
EB2013-263	RMNH.INS.871870	Microscopic slide	Young	Skins larva	Albinaria campylauchen	Exit	ERR180901
EB2013-264	RMNH.INS.871919	Microscopic slide	-	Skins larva	Albinaria campylauchen	Entry + exit	ERR180901
EB2013-270	RMNH.INS.871871	Microscopic slide	Young	Skins larva	Albinaria campylauchen	Entry + exit	ERR180904
EB2013-271	RMNH.INS.871872	Microscopic slide	Young	Skins larva	Albinaria campylauchen	Entry + exit	ERR180904
EB2013-272	RMNH.INS.871873	Microscopic slide	Young	Skins larva	Albinaria campylauchen	Entry + exit	ERR180904
EB2013-273	RMNH.INS.871874	Microscopic slide	Young	Skins larva	Albinaria campylauchen	Entry + exit	ERR180904
EB2013-274	RMNH.INS.871800	Microscopic slide	L	Skins larva	Albinaria campylauchen	Exit	ERR180904
EB2013-275	RMNH.INS.871875	Microscopic slide	Young	Skins larva	Albinaria discolor	Entry + exit	ERR180904
EB2013-277	RMNH.INS.871876	Microscopic slide	Young	Skins larva	Albinaria campylauchen	Exit	ERR180904
EB2013-278	RMNH.INS.871877	Microscopic slide	Young	Skins larva	Albinaria campylauchen	Entry	MS10
EB2013-279	RMNH.INS.871920	Microscopic slide	-	Skins larva	Monacha ocellata / syriaca	No hole	ERR060904
EB2013-280	RMNH.INS.871801	Microscopic slide	L	Skins larva	Albinaria discolor	No hole	ERR160903
EB2013-285	RMNH.INS.559242	Alive - skins in alcohol	M	Larva	Helix sp.	No hole	ERR060913
EB2013-286	RMNH.INS.559234	Alcohol	-	Skins larva	Mastus grandis	No hole	ERR070903
EB2013-287	RMNH.INS.559228	Alcohol	D	Skins larva	Albinaria adriani / linnei	Entry + exit	MS04
EB2013-288	RMNH.INS.559229	Alcohol	D	Skins larva	Albinaria adriani / linnei	Exit	MS04
EB2013-290	RMNH.INS.559230	Alcohol	D	Skins larva	Albinaria adriani / linnei	Exit	ERR130903
EB2013-291	RMNH.INS.559231	Alcohol	D	Skins larva	Albinaria litoraria	No hole	MS02
EB2013-292	RMNH.INS.559232	Alcohol	D	Skins larva	Albinaria adriani / linnei	No hole	MS04
EB2013-322	RMNH.INS.559208	Alcohol	G	Larva	Albinaria krueperi	No hole	ERR100901
EB2013-323	RMNH.INS.559209	Alcohol	G	Larva	Albinaria krueperi	No hole	ERR100901
EB2013-324	RMNH.INS.559227	Dried material	L	Larva	Albinaria edmundi	No hole	MS08
EB2013-325	RMNH.INS.559210	Dried material	G	Skins larva	Albinaria krueperi	Exit	ERR100901
EB2013-326	RMNH.INS.559211	Dried material	G	Skins larva	Albinaria krueperi	Entry	ERR100901
EB2013-327	RMNH.INS.559212	Dried material	G	Skins larva	Albinaria krueperi	Entry + exit	ERR100901
EB2013-328	RMNH.INS.559213	Dried material	G	Skins larva	Albinaria krueperi	Entry	ERR100901
EB2013-329	RMNH.INS.559214	Dried material	G	Skins larva	Albinaria krueperi	Exit	ERR100901
EB2013-330	RMNH.INS.559215	Dried material	G	Skins larva	Albinaria krueperi	Exit	ERR100901
EB2013-331	RMNH.INS.559216	Dried material	G	Skins larva	Albinaria krueperi	No hole	ERR100901
EB2013-332	RMNH.INS.559217	Dried material	G	Skins larva	Albinaria krueperi	No hole	ERR100901
EB2013-333	RMNH.INS.559218	Dried material	G	Skins larva	Albinaria krueperi	No hole	ERR100901
EB2013-334	RMNH.INS.559219	Dried material	G	Skins larva	Albinaria krueperi	No hole	ERR100901
EB2013-335	RMNH.INS.559220	Dried material	G	Skins larva	Albinaria krueperi	No hole	ERR100901
EB2013-340	RMNH.INS.559237	Alcohol	M	Skins larva	Albinaria senilis	No hole	ERR060904	EB2013-341	RMNH.INS.559238
EB2013-342	RMNH.INS.559236	Alcohol	M	Skins larva	Albinaria senilis	No hole	ERR060904
EB2013-343	RMNH.INS.559235	Alcohol	M	Larva	Albinaria senilis	Unknown	ERR060904
EB2013-350	RMNH.INS.559226	Dried material	E	Skins	Albinaria schuchii	No hole	ERR210904
EB2013-351	RMNH.INS.559221	Dried material	L	Skins larva, skins pupa and adult male	Albinaria discolor	Entry	ERR140903b

## Sheet: Collection codes
Collection Code	Country	Province/ Island	Exact localition	Latitude	Longitude	Collectors	Collection date
ERR020904	GREECE	Achaia	Megalou Spileou, cliff on the left of the road past the monastery.	38.08585°N	22.17745°E	Baalbergen, E., Helwerda, R.A. & Schelfhorst, R.	2-IX-2011
ERR040902	GREECE	Kefalonia	Chionata, rocks along road.	38.0838°N	20.72308°E	Baalbergen, E., Helwerda, R.A. & Schelfhorst, R.	4-IX-2011
ERR040903	GREECE	Kefalonia	Chionata, rocks along road.	38.0838°N	20.72308°E	Baalbergen, E., Helwerda, R.A. & Schelfhorst, R.	4-IX-2011
ERR060902	GREECE	Kefalonia	Koutsavos, crevice with concrete structure along road.	38.16813°N	20.51263°E	Baalbergen, E., Helwerda, R.A. & Schelfhorst, R.	6-IX-2011
ERR060903	GREECE	Kefalonia	Koutsavos, crevice with concrete structure along road.	38.16813°N	20.51263°E	Baalbergen, E., Helwerda, R.A. & Schelfhorst, R.	6-IX-2011
ERR060904	GREECE	Kefalonia	Koutsavos, crevice with concrete structure along road.	38.16813°N	20.51263°E	Baalbergen, E., Helwerda, R.A. & Schelfhorst, R.	6-IX-2011
ERR060912	GREECE	Kefalonia	Kastro, rocks and walls in and around Aigio Georgio Castle.	38.13736°N	20.55838°E	Baalbergen, E., Helwerda, R.A. & Schelfhorst, R.	6-IX-2011
ERR060913	GREECE	Kefalonia	Kastro, rocks and walls in and around Aigio Georgio Castle.	38.13736°N	20.55838°E	Baalbergen, E., Helwerda, R.A. & Schelfhorst, R.	6-IX-2011
ERR070903	GREECE	Kefalonia	Poros, cliffs along N-side of road through gorge.	38.1494°N	20.76998°E	Baalbergen, E., Helwerda, R.A. & Schelfhorst, R.	7-IX-2011
ERR070904	GREECE	Kefalonia	Poros, cliffs along N-side of road through gorge, broad area sampled.	38.14913°N	20.76938°E	Baalbergen, E., Helwerda, R.A. & Schelfhorst, R.	7-IX-2011
ERR100901	GREECE	Achaia	Taxiarches, rock outcrop along road to Kalogria, opposite wetland.	38.15581°N	21.40285°E	Baalbergen, E., Helwerda, R.A. & Schelfhorst, R.	10-IX-2011
ERR100901	GREECE	Achaia	Taxiarches, rock outcrop along road to Kalogria, opposite wetland.	38.15581°N	21.40285°E	Baalbergen, E., Helwerda, R.A. & Schelfhorst, R.	10-IX-2011
ERR120901	GREECE	Korinthia	Nemea,temple archeological site.	37.80918°N	22.71256°E	Baalbergen, E., Helwerda, R.A. & Schelfhorst, R.	12-IX-2011
ERR130903	GREECE	Arcadia	Koutroufa, rocks along road opposite wetland south of Astros.	37.38381°N	22.74606°E	Baalbergen, E., Helwerda, R.A. & Schelfhorst, R.	13-IX-2011
ERR130904	GREECE	Arcadia	Koutroufa, rocks along road opposite wetland south of Astros.	37.38381°N	22.74606°E	Baalbergen, E., Helwerda, R.A. & Schelfhorst, R.	13-IX-2011
ERR140901	GREECE	Arcadia	Paralio Astros, rocks and walls in and around Paralio Astros, castle.	37.41723°N	22.76945°E	Baalbergen, E., Helwerda, R.A. & Schelfhorst, R.	14-IX-2011
ERR140903a	GREECE	Arcadia	Kiveri-Astros, rocks along road.	37.4454°N	22.74941°E	Baalbergen, E., Helwerda, R.A. & Schelfhorst, R.	14-IX-2011
ERR140903b	GREECE	Arcadia	Agios Andreas-Arcadico Chorio, first 50 m of rockface along road.	37.3371°N	22.7921°E	Baalbergen, E., Helwerda, R.A. & Schelfhorst, R.	14-IX-2011
ERR140904	GREECE	Arcadia	Agios Andreas-Arcadico Chorio, first 50 m of rockface along road.	37.3371°N	22.7921°E	Baalbergen, E., Helwerda, R.A. & Schelfhorst, R.	14-IX-2011
ERR140905	GREECE	Arcadia	Agios Andreas-Arcadico Chorio, first 50 m of rockface along road.	37.3371°N	22.7921°E	Baalbergen, E., Helwerda, R.A. & Schelfhorst, R.	14-IX-2011
ERR150901	GREECE	Arcadia	Agios Andreas-Arcadico Chorio, rockface along road, west of cow sign.	37.33933°N	22.79626°E	Baalbergen, E., Helwerda, R.A. & Schelfhorst, R.	15-IX-2011
ERR150902	GREECE	Arcadia	Agios Andreas-Arcadico Chorio, rockface along road, west of cow sign.	37.33933°N	22.79626°E	Baalbergen, E., Helwerda, R.A. & Schelfhorst, R.	15-IX-2011
ERR150905	GREECE	Arcadia	Agios Andreas-Arcadico Chorio, rockface along road, near eletricity pole.	37.33926°N	22.79565°E	Baalbergen, E., Helwerda, R.A. & Schelfhorst, R.	15-IX-2011
ERR150906	GREECE	Arcadia	Agios Andreas-Arcadico Chorio, rockface along road, near eletricity pole.	37.33926°N	22.79565°E	Baalbergen, E., Helwerda, R.A. & Schelfhorst, R.	15-IX-2011
ERR160901	GREECE	Arcadia	Agios Andreas, ciffs behind farm.	37.33553°N	22.76281°E	Baalbergen, E., Helwerda, R.A. & Schelfhorst, R.	16-IX-2011
ERR160902	GREECE	Arcadia	Agios Andreas, ciffs behind farm.	37.33553°N	22.76281°E	Baalbergen, E., Helwerda, R.A. & Schelfhorst, R.	16-IX-2011
ERR160903	GREECE	Arcadia	Agios Andreas, ciffs behind farm.	37.33553°N	22.76281°E	Baalbergen, E., Helwerda, R.A. & Schelfhorst, R.	16-IX-2011
ERR170901	GREECE	Arcadia	Leonidio, rockface along road in Dafnon gorge west of Leonidio.	37.16283°N	22.8131°E	Baalbergen, E., Helwerda, R.A. & Schelfhorst, R.	17-IX-2011
ERR170902	GREECE	Arcadia	Leonidio, rockface along road in Dafnon gorge west of Leonidio.	37.16283°N	22.8131°E	Baalbergen, E., Helwerda, R.A. & Schelfhorst, R.	17-IX-2011
ERR170903	GREECE	Arcadia	Leonidio, rockface along road in Dafnon gorge west of Leonidio.	37.16283°N	22.8131°E	Baalbergen, E., Helwerda, R.A. & Schelfhorst, R.	17-IX-2011
ERR180901	GREECE	Lakonia	Monemvasia, S-side of rock outcrop.	36.6865°N	23.04891°E	Baalbergen, E., Helwerda, R.A. & Schelfhorst, R.	18-IX-2011
ERR180904	GREECE	Lakonia	Monemvasia, N-side of rock outcrop.	36.6875°N	23.04866°E	Baalbergen, E., Helwerda, R.A. & Schelfhorst, R.	18-IX-2011
ERR200901	GREECE	Lakonia	Gerolimenas, rockface NW of Gerolimenas.	36.48266°N	22.40128°E	Baalbergen, E., Helwerda, R.A. & Schelfhorst, R.	20-IX-2011
ERR210904	GREECE	Lakonia	Lagia, along road, T-crossing.	36.46393°N	22.47553°E	Baalbergen, E., Helwerda, R.A. & Schelfhorst, R.	21-IX-2011
ERR210905	GREECE	Lakonia	Lagia, along road, T-crossing.	36.46393°N	22.47553°E	Baalbergen, E., Helwerda, R.A. & Schelfhorst, R.	21-IX-2011
MS01	GREECE	Arcadia	Between Argos and Astros.	37.5134°N	22.738983°E	Menno Schilthuizen and Sinos Giokas	VII-2011
MS02	GREECE	Arcadia	Near Astros: immediately N of beach N of Astros.	37.456117°N	22.747183°E	Menno Schilthuizen and Sinos Giokas	VII-2011
MS03	GREECE	Arcadia	Paralion Astros: on walls of the castle.	37.417233°N	22.76945°E	Menno Schilthuizen and Sinos Giokas	VII-2011
MS04	GREECE	Arcadia	Koutroufa, rocks along the road at spring.	37.384083°N	22.746183°E	Menno Schilthuizen and Sinos Giokas	VII-2011
MS06	GREECE	Arcadia	Ca. 2 km S of Ag. Andreas rocks along the road.	37.338017°N	22.792917°E	Menno Schilthuizen and Sinos Giokas	VII-2011
MS08	GREECE	Arcadia	Ca. 3 km from Leonidion into the Dafnos-gorge.	37.161567°N	22.812417°E	Menno Schilthuizen and Sinos Giokas	VII-2011
MS10	GREECE	Lakonia	Monemvasia peninsula.	36.686933°N	23.0481°E	Menno Schilthuizen and Sinos Giokas	VII-2011
MS17	GREECE	Argolida	1 km W of Sterna (ca. 25 NW of Nafplio).			Menno Schilthuizen	VIII-2011

## Sheet: Figure 5a,b
ERR130903					MS04					Koutroufa totaal
	-	Young	E	D	-	Young	E	D		-	Young	E	D
Chondrula bergeri	2	1	2	7	0	0	0	2	Chondrula bergeri	2	1	2	9
Helix figulina	1	0	1	0	0	0	0	0	Helix figulina	1	0	1	0
Lindholmiola lens	0	0	3	2	0	0	1	0	Lindholmiola lens	0	0	4	2
Rumina cf. saharica	1	0	1	0	0	0	0	0	Rumina cf. saharica	1	0	1	0
Albinaria adriani / linnei	0	0	0	1	0	0	0	3	Albinaria adriani / linnei	0	0	0	4
ERR140901					MS03					Paralion Astros totaal
	-	Young	E	D	-	Young	E	D		-	Young	E	D
Lindholmiola lens	0	0	0	0	2	0	4	0	Lindholmiola lens	2	0	4	0
Rumina cf. saharica	2	0	24	0	0	0	0	0	Rumina cf. saharica	2	0	24	0
Albinaria litoraria	0	0	0	0	2	1	1	6	Albinaria litoraria	2	1	1	6
