# Supplementary material for: Predator-Prey Interactions between Shell-Boring Beetle Larvae and Rock-Dwelling Land Snails
Source: PLoS One. 2014 Jun 25;9(6):e100366. doi: 10.1371/journal.pone.0100366 (PMC4070943; doi:10.1371/journal.pone.0100366)
Supplement: Data File S3 — Data Predation Crete: This file contains data used to assess geographic distribution of Drilus predation rates in Albinaria prey across Crete. Material derived from Naturalis Biodiversity Center, Leiden, and Haus der Natur, Cismar. Data available from the Dryad Digital Repository:. (XLS) [file pone.0100366.s005.xls]

## Sheet: Sheet1
Species name	Elevation	UTM Code	Sample Size	sample size category	% Predation	Year	Latitude	Longitude
NA	NA	ge2809	NA	>= 15	4	1987	23.5198	35.3047
NA	NA	ge2905	NA	>= 15	0	1993	23.5307	35.269
NA	NA	ge3007	NA	>= 15	0	1996	23.5415	35.2869
NA	NA	ge3205	NA	>= 15	25	1987	23.5633	35.269
NA	NA	ge3305	NA	>= 15	23.5	1996	23.5741	35.269
NA	NA	ge3322	NA	>= 15	21.1	1988	23.5741	35.4206
NA	NA	ge3332	NA	>= 15	13.3	1993	23.5741	35.5098
NA	NA	ge3404	NA	>= 15	34.5	1987	23.585	35.2601
NA	NA	ge3405	NA	>= 15	58.1	1996	23.585	35.269
NA	NA	ge3526	NA	>= 15	30.4	1992	23.5959	35.4563
NA	NA	ge3527	NA	>= 15	62.5	1988	23.5959	35.4652
NA	NA	ge3527	NA	>= 15	15	1992	23.5959	35.4652
NA	NA	ge3539	NA	>= 15	20.4	1993	23.5959	35.5722
NA	NA	ge3602	NA	>= 15	10	1992	23.6067	35.2423
NA	NA	ge3633	NA	>= 15	25.4	1992	23.6067	35.5187
NA	NA	ge3634	NA	>= 15	27.8	1992	23.6067	35.5276
NA	NA	ge3635	NA	< 15	14.3	1992	23.6067	35.5365
NA	NA	ge3636	NA	< 15	30.8	1993	23.6067	35.5455
NA	NA	ge3902	NA	>= 15	31.3	1987	23.6393	35.2423
NA	NA	ge3931	NA	>= 15	22.9	1992	23.6393	35.5009
NA	NA	ge4002	NA	< 15	33.3	1990	23.6502	35.2423
NA	NA	ge4102	NA	>= 15	35.4	1992	23.6611	35.2423
NA	NA	ge4118	NA	>= 15	9.1	1992	23.6611	35.385
NA	NA	ge4202	NA	>= 15	52.5	1992	23.672	35.2423
NA	NA	ge4205	NA	>= 15	56.3	1992	23.672	35.269
NA	NA	ge4206	NA	>= 15	25.3	1992	23.672	35.278
NA	NA	ge4301	NA	>= 15	16.7	1988	23.6828	35.2334
NA	NA	ge4302	NA	>= 15	47.8	1996	23.6828	35.2423
NA	NA	ge4702	NA	>= 15	35	1987	23.7263	35.2423
NA	NA	ge4804	NA	>= 15	36	1987	23.7372	35.2601
NA	NA	ge4821	NA	>= 15	26.7	1993	23.7372	35.4117
NA	NA	ge4822	NA	>= 15	27.4	1992	23.7372	35.4206
NA	NA	ge4846	NA	>= 15	0	1993	23.7372	35.6346
NA	NA	ge4848	NA	>= 15	9.8	1987	23.7372	35.6525
NA	NA	ge4937	NA	>= 15	21.1	1988	23.748	35.5544
NA	NA	ge4939	NA	>= 15	12.7	1993	23.748	35.5722
NA	NA	ge4940	NA	>= 15	18.3	1993	23.748	35.5811
NA	NA	ge4942	NA	>= 15	3.4	1993	23.748	35.599
NA	NA	ge5015	NA	< 15	40	1988	23.7589	35.3582
NA	NA	ge5022	NA	>= 15	50	1988	23.7589	35.4206
NA	NA	ge5023	NA	< 15	30	1988	23.7589	35.4295
NA	NA	ge5039	NA	>= 15	23.8	1993	23.7589	35.5722
NA	NA	ge5039	NA	>= 15	21.8	1993	23.7589	35.5722
NA	NA	ge5040	NA	>= 15	23.6	1992	23.7589	35.5811
NA	NA	ge5138	NA	>= 15	11.9	1988	23.7698	35.5633
NA	NA	ge5138	NA	>= 15	18.8	1992	23.7698	35.5633
NA	NA	ge5139	NA	>= 15	22.2	1992	23.7698	35.5722
NA	NA	ge5141	NA	>= 15	4.7	1992	23.7698	35.59
NA	NA	ge5403	NA	>= 15	24	1987	23.8024	35.2512
NA	NA	ge5404	NA	>= 15	26.3	1993	23.8024	35.2601
NA	NA	ge5503	NA	>= 15	32.2	1993	23.8133	35.2512
NA	NA	ge5507	NA	< 15	8.3	1993	23.8133	35.2869
NA	NA	ge5606	NA	>= 15	33.3	1993	23.8241	35.278
NA	NA	ge5612	NA	>= 15	0	1996	23.8241	35.3315
NA	NA	ge5614	NA	>= 15	4.7	1992	23.8241	35.3493
NA	NA	ge5704	NA	>= 15	5.9	1987	23.835	35.2601
NA	NA	ge5707	NA	>= 15	0	1993	23.835	35.2869
NA	NA	ge5928	NA	>= 15	18.8	1993	23.8567	35.4741
NA	NA	ge6217	NA	>= 15	42.3	1976	23.8894	35.376
NA	NA	ge6318	NA	< 15	20	1988	23.9002	35.385
NA	NA	ge6328	NA	>= 15	37	1993	23.9002	35.4741
NA	NA	ge6411	NA	>= 15	42.5	1988	23.9111	35.3225
NA	NA	ge6415	NA	>= 15	20.4	1992	23.9111	35.3582
NA	NA	ge6415	NA	>= 15	14.3	1993	23.9111	35.3582
NA	NA	ge6416	NA	>= 15	43.5	1993	23.9111	35.3671
NA	NA	ge6419	NA	>= 15	51.3	1993	23.9111	35.3939
NA	NA	ge6510	NA	>= 15	29.2	1988	23.922	35.3136
NA	NA	ge6510	NA	>= 15	20	1992	23.922	35.3136
NA	NA	ge6528	NA	>= 15	21.6	1993	23.922	35.4741
NA	NA	ge7123	NA	>= 15	63.6	1993	23.9872	35.4295
NA	NA	ge7129	NA	< 15	40	1993	23.9872	35.483
NA	NA	ku2669	NA	>= 15	57.1	1987	24.0144	34.9613
NA	NA	ku2670	NA	>= 15	37.7	1992	24.0144	34.9702
NA	NA	ku2671	NA	< 15	30	1992	24.0144	34.9791
NA	NA	ku2768	NA	< 15	28.6	1992	24.0252	34.9524
NA	NA	ku2769	NA	< 15	45.5	1992	24.0252	34.9613
NA	NA	ku2770	NA	>= 15	12.5	1992	24.0252	34.9702
NA	NA	ku2868	NA	< 15	28.6	1992	24.0361	34.9524
NA	NA	ku3059	NA	< 15	70	1992	24.0579	34.8721
NA	NA	ku3060	NA	>= 15	23.3	1992	24.0579	34.881
NA	NA	ku3158	NA	>= 15	47.1	1992	24.0687	34.8632
NA	NA	ku3159	NA	>= 15	65	1992	24.0687	34.8721
NA	NA	ku3160	NA	>= 15	30	1992	24.0687	34.881
NA	NA	ku3256	NA	>= 15	17.6	1992	24.0796	34.8454
NA	NA	ku3257	NA	>= 15	30.4	1992	24.0796	34.8543
NA	NA	ku3258	NA	>= 15	28.6	1992	24.0796	34.8632
NA	NA	ku3259	NA	>= 15	37.5	1992	24.0796	34.8721
NA	NA	ku3259	NA	>= 15	33.3	1992	24.0796	34.8721
NA	NA	ku3260	NA	>= 15	50	1992	24.0796	34.881
NA	NA	ku3261	NA	< 15	33.3	1992	24.0796	34.89
NA	NA	ku3356	NA	< 15	20	1992	24.0905	34.8454
NA	NA	ku3357	NA	< 15	23.1	1992	24.0905	34.8543
NA	NA	ku3358	NA	>= 15	27.3	1992	24.0905	34.8632
NA	NA	ku3359	NA	< 15	23.1	1992	24.0905	34.8721
NA	NA	ku3360	NA	>= 15	20.7	1992	24.0905	34.881
NA	NA	ku3361	NA	>= 15	25	1992	24.0905	34.89
NA	NA	ku3456	NA	< 15	18.2	1992	24.1013	34.8454
NA	NA	ku3457	NA	>= 15	7.4	1992	24.1013	34.8543
NA	NA	ku3460	NA	< 15	7.1	1992	24.1013	34.881
NA	NA	ku3461	NA	>= 15	22.2	1992	24.1013	34.89
NA	NA	ku3554	NA	< 15	58.3	1992	24.1122	34.8275
NA	NA	ku3555	NA	>= 15	33.3	1992	24.1122	34.8365
NA	NA	ku3556	NA	< 15	30	1992	24.1122	34.8454
NA	NA	ku3557	NA	>= 15	9.5	1992	24.1122	34.8543
NA	NA	ku3558	NA	>= 15	45	1992	24.1122	34.8632
NA	NA	ku3560	NA	>= 15	26.7	1992	24.1122	34.881
NA	NA	ku3599	NA	>= 15	45.7	1992	24.1122	35.2288
NA	NA	ku3799	NA	>= 15	20.8	1992	24.1339	35.2288
NA	NA	ku3899	NA	>= 15	46.4	1992	24.1448	35.2288
NA	NA	ku3999	NA	>= 15	20.7	1992	24.1557	35.2288
NA	NA	ku4499	NA	>= 15	22.7	1992	24.21	35.2288
NA	NA	ku4796	NA	>= 15	20	1992	24.2426	35.202
NA	NA	ku5198	NA	< 15	7.1	1992	24.2861	35.2199
NA	NA	ku5497	NA	>= 15	28.6	1992	24.3187	35.211
NA	NA	ku5597	NA	>= 15	22.5	1993	24.3296	35.211
NA	NA	ku5796	NA	< 15	8.3	1993	24.3513	35.202
NA	NA	ku5898	NA	>= 15	18.2	1992	24.3622	35.2199
NA	NA	ku5898	NA	< 15	8.3	1993	24.3622	35.2199
NA	NA	ku6197	NA	>= 15	28.6	1986	24.3948	35.211
NA	NA	ku6296	NA	>= 15	40	1993	24.4057	35.202
NA	NA	ku6297	NA	>= 15	60.4	1986	24.4057	35.211
NA	NA	ku6298	NA	>= 15	48	1993	24.4057	35.2199
NA	NA	ku6299	NA	>= 15	32.5	1992	24.4057	35.2288
NA	NA	ku6397	NA	>= 15	40	1976	24.4165	35.211
NA	NA	ku6494	NA	>= 15	36	1993	24.4274	35.1842
NA	NA	ku6496	NA	>= 15	27.3	1993	24.4274	35.202
NA	NA	ku6694	NA	>= 15	9.1	1993	24.4492	35.1842
NA	NA	kv6810	NA	>= 15	15.2	1993	24.4709	35.3269
NA	NA	kv6815	NA	>= 15	20	1976	24.4709	35.3715
NA	NA	ku6893	NA	>= 15	14.3	1993	24.4709	35.1753
NA	NA	ku6895	NA	>= 15	4.7	1986	24.4709	35.1931
NA	NA	ku6896	NA	>= 15	28.1	1986	24.4709	35.202
NA	NA	kv6910	NA	>= 15	3.6	1976	24.4818	35.3269
NA	NA	ku6992	NA	>= 15	8	1993	24.4818	35.1664
NA	NA	ku6996	NA	>= 15	35.7	1993	24.4818	35.202
NA	NA	ku6999	NA	>= 15	43.6	1986	24.4818	35.2288
NA	NA	ku7499	NA	>= 15	50	1986	24.5361	35.2288
NA	NA	ku7598	NA	>= 15	9.3	1986	24.547	35.2199
NA	NA	ku7975	NA	>= 15	0	1990	24.5905	35.0148
NA	NA	ku8096	NA	>= 15	42.9	1996	24.6013	35.202
NA	NA	ku8192	NA	>= 15	27.3	1976	24.6122	35.1664
NA	NA	ku8196	NA	>= 15	16.7	1996	24.6122	35.202
NA	NA	ku8295	NA	>= 15	23.5	1996	24.6231	35.1931
NA	NA	ku8296	NA	< 15	0	1996	24.6231	35.202
NA	NA	ku8297	NA	>= 15	36.4	1996	24.6231	35.211
NA	NA	ku8394	NA	>= 15	5.3	1996	24.6339	35.1842
NA	NA	ku8394	NA	>= 15	22.2	1996	24.6339	35.1842
NA	NA	ku8395	NA	>= 15	41.7	1996	24.6339	35.1931
NA	NA	ku8593	NA	>= 15	27.6	1996	24.6557	35.1753
NA	NA	ku8594	NA	>= 15	43.8	1996	24.6557	35.1842
NA	NA	ku8594	NA	>= 15	40.7	1996	24.6557	35.1842
NA	NA	ku8693	NA	>= 15	46.7	1996	24.6665	35.1753
NA	NA	ku8694	NA	>= 15	42.1	1996	24.6665	35.1842
NA	NA	ku9198	NA	>= 15	19.4	1988	24.7209	35.2199
NA	NA	ku9198	NA	>= 15	12.3	1994	24.7209	35.2199
NA	NA	ku9298	NA	>= 15	7.5	1994	24.7318	35.2199
NA	NA	ku9474	NA	>= 15	51.5	1993	24.7535	35.0059
NA	NA	ku9495	NA	>= 15	7.1	1996	24.7535	35.1931
NA	NA	ku9967	NA	>= 15	59.4	1993	24.8079	34.9435
NA	NA	ku9967	NA	>= 15	32.5	1993	24.8079	34.9435
NA	NA	ku9968	NA	>= 15	27.3	1993	24.8079	34.9524
NA	NA	kv3001	NA	>= 15	37.5	1992	24.0579	35.2466
NA	NA	kv3027	NA	>= 15	1.7	1993	24.0579	35.4785
NA	NA	kv3027	NA	>= 15	27.3	1993	24.0579	35.4785
NA	NA	kv3029	NA	>= 15	50	1993	24.0579	35.4963
NA	NA	kv3101	NA	>= 15	5.4	1993	24.0687	35.2466
NA	NA	kv3129	NA	>= 15	40	1993	24.0687	35.4963
NA	NA	kv3322	NA	>= 15	28.6	1993	24.0905	35.4339
NA	NA	kv3328	NA	>= 15	19.7	1992	24.0905	35.4874
NA	NA	kv3332	NA	>= 15	2.1	1993	24.0905	35.523
NA	NA	kv3332	NA	>= 15	0	1996	24.0905	35.523
NA	NA	kv3427	NA	>= 15	4.8	1993	24.1013	35.4785
NA	NA	kv3432	NA	>= 15	2.7	1993	24.1013	35.523
NA	NA	kv3500	NA	>= 15	27.3	1992	24.1122	35.2377
NA	NA	kv3533	NA	>= 15	3.1	1996	24.1122	35.532
NA	NA	kv3626	NA	>= 15	32.5	1993	24.1231	35.4695
NA	NA	kv3641	NA	>= 15	6.5	1993	24.1231	35.6033
NA	NA	kv3733	NA	< 15	20	1986	24.1339	35.532
NA	NA	kv3733	NA	< 15	7.1	1986	24.1339	35.532
NA	NA	kv3742	NA	>= 15	26.9	1993	24.1339	35.6122
NA	NA	kv3827	NA	>= 15	15.8	1993	24.1448	35.4785
NA	NA	kv3936	NA	>= 15	0	1996	24.1557	35.5587
NA	NA	kv4102	NA	>= 15	30	1986	24.1774	35.2555
NA	NA	kv4102	NA	>= 15	26.3	1992	24.1774	35.2555
NA	NA	kv4136	NA	>= 15	34.5	1988	24.1774	35.5587
NA	NA	kv4203	NA	>= 15	25.9	1992	24.1883	35.2645
NA	NA	kv4515	NA	>= 15	40	1993	24.2209	35.3715
NA	NA	kv4625	NA	< 15	0	1992	24.2318	35.4606
NA	NA	kv4625	NA	< 15	2	1992	24.2318	35.4606
NA	NA	kv4626	NA	>= 15	6.7	1992	24.2318	35.4695
NA	NA	kv4818	NA	>= 15	8.4	1992	24.2535	35.3982
NA	NA	kv4824	NA	>= 15	13.6	1992	24.2535	35.4517
NA	NA	kv4904	NA	>= 15	10	1986	24.2644	35.2734
NA	NA	kv6200	NA	>= 15	61.5	1992	24.4057	35.2377
NA	NA	kv6300	NA	>= 15	25	1996	24.4165	35.2377
NA	NA	kv6511	NA	>= 15	14.6	1986	24.4383	35.3358
NA	NA	kv6901	NA	>= 15	10	1986	24.4818	35.2466
NA	NA	kv6916	NA	>= 15	30	1988	24.4818	35.3804
NA	NA	kv7206	NA	>= 15	22	1993	24.5144	35.2912
NA	NA	kv7411	NA	>= 15	0	1988	24.5361	35.3358
NA	NA	kv7412	NA	>= 15	5.3	1996	24.5361	35.3447
NA	NA	kv7508	NA	>= 15	23.1	1993	24.547	35.309
NA	NA	kv7800	NA	>= 15	34.3	1996	24.5796	35.2377
NA	NA	kv7901	NA	>= 15	42.9	1996	24.5905	35.2466
NA	NA	kv8304	NA	>= 15	24.1	1996	24.6339	35.2734
NA	NA	kv8417	NA	>= 15	29	1996	24.6448	35.3893
NA	NA	kv8419	NA	>= 15	5.9	1996	24.6448	35.4071
NA	NA	kv8503	NA	>= 15	37.5	1988	24.6557	35.2645
NA	NA	kv8509	NA	< 15	42.9	1996	24.6557	35.318
NA	NA	kv8510	NA	>= 15	24.1	1996	24.6557	35.3269
NA	NA	kv8511	NA	>= 15	40.9	1996	24.6557	35.3358
NA	NA	kv8512	NA	>= 15	20	1996	24.6557	35.3447
NA	NA	kv8520	NA	>= 15	27.6	1996	24.6557	35.416
NA	NA	kv8603	NA	>= 15	41.2	1993	24.6665	35.2645
NA	NA	kv9000	NA	>= 15	0	1993	24.71	35.2377
NA	NA	kv9005	NA	>= 15	15.8	1996	24.71	35.2823
NA	NA	kv9006	NA	>= 15	24.3	1996	24.71	35.2912
NA	NA	kv9012	NA	>= 15	23.9	1996	24.71	35.3447
NA	NA	kv9104	NA	>= 15	58.3	1996	24.7209	35.2734
NA	NA	kv9105	NA	>= 15	59.1	1996	24.7209	35.2823
NA	NA	kv9107	NA	< 15	33.3	1996	24.7209	35.3001
NA	NA	kv9107	NA	< 15	14.3	1996	24.7209	35.3001
NA	NA	kv9107	NA	>= 15	29.2	1996	24.7209	35.3001
NA	NA	kv9205	NA	>= 15	22.2	1990	24.7318	35.2823
NA	NA	kv9206	NA	>= 15	35.6	1996	24.7318	35.2912
NA	NA	kv9207	NA	>= 15	45.5	1996	24.7318	35.3001
NA	NA	kv9411	NA	>= 15	5.6	1996	24.7535	35.3358
NA	NA	kv9415	NA	>= 15	7.4	1996	24.7535	35.3715
NA	NA	kv9418	NA	>= 15	7.7	1990	24.7535	35.3982
NA	NA	kv9508	NA	< 15	10	1996	24.7644	35.309
NA	NA	kv9620	NA	>= 15	31.9	1990	24.7752	35.416
NA	NA	lu0069	NA	>= 15	21.1	1993	24.8187	34.9613
NA	NA	lu0192	NA	>= 15	43.8	1993	24.8296	35.1664
NA	NA	lu0294	NA	>= 15	7.7	1990	24.8405	35.1842
NA	NA	lu0295	NA	>= 15	10.5	1990	24.8405	35.1931
NA	NA	lu0296	NA	>= 15	7.7	1990	24.8405	35.202
NA	NA	lu0297	NA	>= 15	18.2	1990	24.8405	35.211
NA	NA	lu0297	NA	>= 15	13.9	1993	24.8405	35.211
NA	NA	lu0393	NA	>= 15	9.1	1990	24.8513	35.1753
NA	NA	lu0394	NA	>= 15	26.3	1990	24.8513	35.1842
NA	NA	lu0395	NA	>= 15	14.3	1990	24.8513	35.1931
NA	NA	lu0396	NA	>= 15	16.7	1990	24.8513	35.202
NA	NA	lu0398	NA	>= 15	63.6	1990	24.8513	35.2199
NA	NA	lu0495	NA	>= 15	10.5	1990	24.8622	35.1931
NA	NA	lu0496	NA	>= 15	6.7	1990	24.8622	35.202
NA	NA	lu0497	NA	>= 15	35.7	1990	24.8622	35.211
NA	NA	lu0573	NA	>= 15	28.6	1993	24.8731	34.997
NA	NA	lu0574	NA	>= 15	59	1993	24.8731	35.0059
NA	NA	lu0575	NA	>= 15	46.2	1993	24.8731	35.0148
NA	NA	lu0698	NA	>= 15	12	1990	24.8839	35.2199
NA	NA	lu0795	NA	>= 15	23.7	1990	24.8948	35.1931
NA	NA	lu0867	NA	>= 15	0	1990	24.9057	34.9435
NA	NA	lu0871	NA	>= 15	25	1993	24.9057	34.9791
NA	NA	lu0897	NA	>= 15	31.6	1990	24.9057	35.211
NA	NA	lu1072	NA	>= 15	31.6	1993	24.9274	34.988
NA	NA	lu1074	NA	>= 15	26.2	1993	24.9274	35.0059
NA	NA	lu1174	NA	>= 15	4.4	1993	24.9383	35.0059
NA	NA	lu1190	NA	>= 15	16.7	1990	24.9383	35.1485
NA	NA	lu1272	NA	>= 15	33.3	1993	24.9492	34.988
NA	NA	lu1374	NA	>= 15	44	1993	24.96	35.0059
NA	NA	lu1375	NA	>= 15	44.7	1993	24.96	35.0148
NA	NA	lu1381	NA	>= 15	0	1993	24.96	35.0683
NA	NA	lu1471	NA	>= 15	23.1	1993	24.9709	34.9791
NA	NA	lu1496	NA	< 15	25	1990	24.9709	35.202
NA	NA	lu1497	NA	>= 15	23.5	1990	24.9709	35.211
NA	NA	lu1672	NA	>= 15	2.9	1993	24.9926	34.988
NA	NA	lu1683	NA	>= 15	35.7	1993	24.9926	35.0861
NA	NA	lu1697	NA	< 15	40	1990	24.9926	35.211
NA	NA	lu1786	NA	>= 15	7.8	1990	25.0035	35.1129
NA	NA	lu1972	NA	>= 15	39.1	1993	25.0252	34.988
NA	NA	lu1973	NA	>= 15	35	1993	25.0252	34.997
NA	NA	lu1989	NA	>= 15	20	1990	25.0252	35.1396
NA	NA	lu2093	NA	>= 15	9.8	1990	25.0361	35.1753
NA	NA	lu2196	NA	>= 15	3.8	1986	25.047	35.202
NA	NA	lu2386	NA	>= 15	0	1976	25.0687	35.1129
NA	NA	lu2689	NA	>= 15	2.8	1994	25.1013	35.1396
NA	NA	lu2770	NA	>= 15	27.8	1992	25.1122	34.9702
NA	NA	lu2794	NA	>= 15	0	1990	25.1122	35.1842
NA	NA	lu2796	NA	>= 15	30	1990	25.1122	35.202
NA	NA	lu2875	NA	>= 15	14.3	1993	25.1231	35.0148
NA	NA	lu2889	NA	>= 15	21.1	1994	25.1231	35.1396
NA	NA	lu2972	NA	< 15	18.2	1992	25.1339	34.988
NA	NA	lu3075	NA	>= 15	19	1990	25.1448	35.0148
NA	NA	lu3175	NA	>= 15	10.7	1990	25.1557	35.0148
NA	NA	lu3370	NA	>= 15	28.9	1994	25.1774	34.9702
NA	NA	lu3382	NA	< 15	0	1990	25.1774	35.0772
NA	NA	lu3383	NA	< 15	33.3	1990	25.1774	35.0861
NA	NA	lu3481	NA	>= 15	0	1990	25.1883	35.0683
NA	NA	lu3482	NA	>= 15	0	1990	25.1883	35.0772
NA	NA	lu3488	NA	>= 15	20.9	1990	25.1883	35.1307
NA	NA	lu3495	NA	>= 15	21.4	1992	25.1883	35.1931
NA	NA	lu3584	NA	>= 15	0	1990	25.1992	35.095
NA	NA	lu3585	NA	< 15	0	1990	25.1992	35.104
NA	NA	lu3672	NA	>= 15	29	1992	25.21	34.988
NA	NA	lu3684	NA	>= 15	0	1990	25.21	35.095
NA	NA	lu3772	NA	>= 15	38.1	1992	25.2209	34.988
NA	NA	lu3781	NA	>= 15	0	1990	25.2209	35.0683
NA	NA	lu3877	NA	< 15	0	1990	25.2318	35.0326
NA	NA	lu3881	NA	< 15	0	1990	25.2318	35.0683
NA	NA	lu3977	NA	< 15	15.4	1990	25.2426	35.0326
NA	NA	lu3999	NA	>= 15	38.5	1990	25.2426	35.2288
NA	NA	lu4097	NA	>= 15	33	1992	25.2535	35.211
NA	NA	lu4098	NA	>= 15	69.2	1992	25.2535	35.2199
NA	NA	lu4179	NA	>= 15	15	1990	25.2644	35.0505
NA	NA	lu4191	NA	>= 15	15.1	1990	25.2644	35.1575
NA	NA	lu4277	NA	>= 15	19.3	1992	25.2752	35.0326
NA	NA	lu4286	NA	< 15	0	1990	25.2752	35.1129
NA	NA	lu4287	NA	< 15	0	1990	25.2752	35.1218
NA	NA	lu4296	NA	>= 15	0	1994	25.2752	35.202
NA	NA	lu4372	NA	< 15	30.8	1990	25.2861	34.988
NA	NA	lu4373	NA	>= 15	6.3	1992	25.2861	34.997
NA	NA	lu4387	NA	>= 15	0	1990	25.2861	35.1218
NA	NA	lu4396	NA	>= 15	23.5	1994	25.2861	35.202
NA	NA	lu4472	NA	>= 15	6.7	1990	25.297	34.988
NA	NA	lu4473	NA	< 15	8.3	1990	25.297	34.997
NA	NA	lu4477	NA	< 15	0	1990	25.297	35.0326
NA	NA	lu4480	NA	>= 15	3.1	1990	25.297	35.0594
NA	NA	lu4481	NA	>= 15	0	1990	25.297	35.0683
NA	NA	lu4490	NA	>= 15	20	1976	25.297	35.1485
NA	NA	lu4573	NA	>= 15	0	1990	25.3079	34.997
NA	NA	lu4679	NA	< 15	45.5	1990	25.3187	35.0505
NA	NA	lu4684	NA	< 15	0	1990	25.3187	35.095
NA	NA	lu4685	NA	< 15	0	1990	25.3187	35.104
NA	NA	lu4779	NA	< 15	16.7	1990	25.3296	35.0505
NA	NA	lu4783	NA	< 15	0	1990	25.3296	35.0861
NA	NA	lu4784	NA	< 15	0	1990	25.3296	35.095
NA	NA	lu4889	NA	>= 15	12.5	1996	25.3405	35.1396
NA	NA	lu4890	NA	>= 15	18.8	1996	25.3405	35.1485
NA	NA	lu4983	NA	>= 15	5	1990	25.3513	35.0861
NA	NA	lu4986	NA	< 15	9.1	1990	25.3513	35.1129
NA	NA	lu4988	NA	< 15	0	1990	25.3513	35.1307
NA	NA	lu4990	NA	>= 15	13.3	1996	25.3513	35.1485
NA	NA	lu5073	NA	< 15	25	1990	25.3622	34.997
NA	NA	lu5081	NA	>= 15	26.8	1988	25.3622	35.0683
NA	NA	lu5082	NA	>= 15	15.4	1992	25.3622	35.0772
NA	NA	lu5173	NA	>= 15	36.4	1992	25.3731	34.997
NA	NA	lu5174	NA	< 15	9.1	1990	25.3731	35.0059
NA	NA	lu5181	NA	< 15	0	1990	25.3731	35.0683
NA	NA	lu5186	NA	>= 15	50	1992	25.3731	35.1129
NA	NA	lu5190	NA	>= 15	19.4	1996	25.3731	35.1485
NA	NA	lu5275	NA	>= 15	31.3	1992	25.3839	35.0148
NA	NA	lu5276	NA	>= 15	16.7	1990	25.3839	35.0237
NA	NA	lu5279	NA	< 15	0	1990	25.3839	35.0505
NA	NA	lu5283	NA	>= 15	16.7	1990	25.3839	35.0861
NA	NA	lu5284	NA	< 15	0	1990	25.3839	35.095
NA	NA	lu5285	NA	< 15	0	1990	25.3839	35.104
NA	NA	lu5285	NA	>= 15	13.3	1990	25.3839	35.104
NA	NA	lu5376	NA	< 15	30	1990	25.3948	35.0237
NA	NA	lu5473	NA	< 15	0	1990	25.4057	34.997
NA	NA	lu5476	NA	< 15	0	1990	25.4057	35.0237
NA	NA	lu5480	NA	>= 15	50	1986	25.4057	35.0594
NA	NA	lu5574	NA	< 15	14.3	1990	25.4166	35.0059
NA	NA	lu5579	NA	>= 15	16.7	1976	25.4166	35.0505
NA	NA	lu5589	NA	>= 15	NA	1990	25.4166	35.1396
NA	NA	lu5589	NA	>= 15	7.4	1990	25.4166	35.1396
NA	NA	lu5589	NA	>= 15	11.8	1996	25.4166	35.1396
NA	NA	lu5589	NA	>= 15	7.4	1996	25.4166	35.1396
NA	NA	lu5678	NA	>= 15	31.3	1990	25.4274	35.0415
NA	NA	lu5689	NA	>= 15	44.4	1996	25.4274	35.1396
NA	NA	lu5695	NA	>= 15	21.7	1996	25.4274	35.1931
NA	NA	lu5778	NA	>= 15	13.5	1986	25.4383	35.0415
NA	NA	lu5779	NA	>= 15	13	1990	25.4383	35.0505
NA	NA	lu5788	NA	>= 15	44.4	1996	25.4383	35.1307
NA	NA	lu5788	NA	>= 15	13.3	1996	25.4383	35.1307
NA	NA	lu5794	NA	>= 15	56	1996	25.4383	35.1842
NA	NA	lu5878	NA	>= 15	41.2	1976	25.4492	35.0415
NA	NA	lu5878	NA	>= 15	0	1993	25.4492	35.0415
NA	NA	lu5890	NA	< 15	46.2	1996	25.4492	35.1485
NA	NA	lu5895	NA	>= 15	20	1996	25.4492	35.1931
NA	NA	lu5973	NA	< 15	0	1990	25.46	34.997
NA	NA	lu5974	NA	< 15	27.3	1990	25.46	35.0059
NA	NA	lu5979	NA	< 15	30	1990	25.46	35.0505
NA	NA	lu5989	NA	>= 15	41.7	1996	25.46	35.1396
NA	NA	lu5998	NA	>= 15	22.7	1996	25.46	35.2199
NA	NA	lu6074	NA	>= 15	44.1	1990	25.4709	35.0059
NA	NA	lu6074	NA	>= 15	27.3	1993	25.4709	35.0059
NA	NA	lu6090	NA	< 15	27.3	1996	25.4709	35.1485
NA	NA	lu6097	NA	>= 15	33.3	1996	25.4709	35.211
NA	NA	lu6098	NA	>= 15	5.3	1996	25.4709	35.2199
NA	NA	lu6187	NA	>= 15	23.5	1996	25.4818	35.1218
NA	NA	lu6191	NA	>= 15	0	1996	25.4818	35.1575
NA	NA	lu6196	NA	>= 15	12.5	1996	25.4818	35.202
NA	NA	lu6199	NA	>= 15	0	1996	25.4818	35.2288
NA	NA	lu6273	NA	< 15	0	1990	25.4926	34.997
NA	NA	lu6285	NA	>= 15	17.6	1996	25.4926	35.104
NA	NA	lu6287	NA	>= 15	27.8	1996	25.4926	35.1218
NA	NA	lu6288	NA	>= 15	50	1996	25.4926	35.1307
NA	NA	lu6293	NA	>= 15	27.8	1996	25.4926	35.1753
NA	NA	lu6298	NA	>= 15	12.5	1996	25.4926	35.2199
NA	NA	lu6392	NA	>= 15	32	1996	25.5035	35.1664
NA	NA	lu6395	NA	>= 15	12.5	1996	25.5035	35.1931
NA	NA	lu6396	NA	>= 15	43.8	1996	25.5035	35.202
NA	NA	lu6397	NA	>= 15	12.9	1996	25.5035	35.211
NA	NA	lu6398	NA	>= 15	46.4	1996	25.5035	35.2199
NA	NA	lu6399	NA	>= 15	25	1996	25.5035	35.2288
NA	NA	lu6473	NA	< 15	16.7	1996	25.5144	34.997
NA	NA	lu6477	NA	< 15	8.3	1996	25.5144	35.0326
NA	NA	lu6484	NA	>= 15	11.1	1996	25.5144	35.095
NA	NA	lu6495	NA	>= 15	23.5	1996	25.5144	35.1931
NA	NA	lu6496	NA	>= 15	38.1	1996	25.5144	35.202
NA	NA	lu6497	NA	>= 15	29.2	1996	25.5144	35.211
NA	NA	lu6498	NA	>= 15	13	1996	25.5144	35.2199
NA	NA	lu6585	NA	>= 15	25	1996	25.5252	35.104
NA	NA	lu6591	NA	>= 15	40	1990	25.5252	35.1575
NA	NA	lu6591	NA	>= 15	31.3	1996	25.5252	35.1575
NA	NA	lu6595	NA	>= 15	18.2	1986	25.5252	35.1931
NA	NA	lu6599	NA	>= 15	20.8	1996	25.5252	35.2288
NA	NA	lu6684	NA	>= 15	20	1996	25.5361	35.095
NA	NA	lu6690	NA	>= 15	44.4	1996	25.5361	35.1485
NA	NA	lu6690	NA	>= 15	44.4	1996	25.5361	35.1485
NA	NA	lu6691	NA	>= 15	11.8	1996	25.5361	35.1575
NA	NA	lu6776	NA	>= 15	2.5	1986	25.547	35.0237
NA	NA	lu6784	NA	>= 15	12.5	1996	25.547	35.095
NA	NA	lu6784	NA	< 15	7.7	1996	25.547	35.095
NA	NA	lu6785	NA	>= 15	33.3	1996	25.547	35.104
NA	NA	lu6789	NA	>= 15	0	1996	25.547	35.1396
NA	NA	lu6791	NA	>= 15	19	1996	25.547	35.1575
NA	NA	lu6896	NA	>= 15	10.5	1996	25.5579	35.202
NA	NA	lu6983	NA	>= 15	25	1996	25.5687	35.0861
NA	NA	lu6986	NA	>= 15	3.6	1996	25.5687	35.1129
NA	NA	lu6990	NA	>= 15	33.3	1996	25.5687	35.1485
NA	NA	lu7084	NA	< 15	9.1	1996	25.5796	35.095
NA	NA	lu7086	NA	>= 15	6.3	1996	25.5796	35.1129
NA	NA	lu7176	NA	>= 15	17.6	1996	25.5905	35.0237
NA	NA	lu7185	NA	>= 15	30	1996	25.5905	35.104
NA	NA	lu7276	NA	>= 15	41.9	1993	25.6013	35.0237
NA	NA	lu7284	NA	>= 15	38	1996	25.6013	35.095
NA	NA	lu7298	NA	>= 15	7.1	1993	25.6013	35.2199
NA	NA	lu7298	NA	>= 15	14.3	1996	25.6013	35.2199
NA	NA	lu7381	NA	>= 15	26.7	1996	25.6122	35.0683
NA	NA	lu7382	NA	>= 15	34.3	1996	25.6122	35.0772
NA	NA	lu7383	NA	>= 15	30.1	1996	25.6122	35.0861
NA	NA	lu7384	NA	>= 15	8.3	1996	25.6122	35.095
NA	NA	lu7386	NA	>= 15	35	1996	25.6122	35.1129
NA	NA	lu7391	NA	>= 15	41.7	1996	25.6122	35.1575
NA	NA	lu7478	NA	>= 15	12.5	1996	25.6231	35.0415
NA	NA	lu7485	NA	>= 15	9.5	1996	25.6231	35.104
NA	NA	lu7493	NA	>= 15	5.3	1996	25.6231	35.1753
NA	NA	lu7574	NA	>= 15	39.3	1996	25.6339	35.0059
NA	NA	lu7586	NA	>= 15	56.5	1996	25.6339	35.1129
NA	NA	lu7596	NA	>= 15	25.4	1996	25.6339	35.202
NA	NA	lu7674	NA	< 15	14.3	1996	25.6448	35.0059
NA	NA	lu7678	NA	< 15	27.3	1996	25.6448	35.0415
NA	NA	lu7687	NA	>= 15	26.9	1996	25.6448	35.1218
NA	NA	lu7687	NA	>= 15	31.4	1996	25.6448	35.1218
NA	NA	lu7687	NA	>= 15	46.2	1996	25.6448	35.1218
NA	NA	lu7778	NA	>= 15	NA	1990	25.6557	35.0415
NA	NA	lu7778	NA	>= 15	30.8	1992	25.6557	35.0415
NA	NA	lu7779	NA	>= 15	26.7	1996	25.6557	35.0505
NA	NA	lu7781	NA	< 15	36.4	1996	25.6557	35.0683
NA	NA	lu7789	NA	>= 15	36.4	1996	25.6557	35.1396
NA	NA	lu7877	NA	< 15	45.5	1996	25.6666	35.0326
NA	NA	lu7878	NA	>= 15	60	1996	25.6666	35.0415
NA	NA	lu7881	NA	>= 15	40	1993	25.6666	35.0683
NA	NA	lu7883	NA	>= 15	38.1	1996	25.6666	35.0861
NA	NA	lu7886	NA	>= 15	32	1996	25.6666	35.1129
NA	NA	lu7888	NA	>= 15	27.3	1993	25.6666	35.1307
NA	NA	lu7889	NA	>= 15	26.7	1996	25.6666	35.1396
NA	NA	lu7977	NA	>= 15	29.4	1992	25.6774	35.0326
NA	NA	lu7977	NA	>= 15	16.3	1996	25.6774	35.0326
NA	NA	lu7978	NA	< 15	54.5	1996	25.6774	35.0415
NA	NA	lu7979	NA	>= 15	25	1993	25.6774	35.0505
NA	NA	lu7979	NA	< 15	50	1996	25.6774	35.0505
NA	NA	lu7986	NA	>= 15	30.5	1993	25.6774	35.1129
NA	NA	lu8077	NA	< 15	42.9	1996	25.6883	35.0326
NA	NA	lu8083	NA	>= 15	25	1993	25.6883	35.0861
NA	NA	lu8085	NA	< 15	15.4	1996	25.6883	35.104
NA	NA	lu8086	NA	>= 15	28.1	1996	25.6883	35.1129
NA	NA	lu8094	NA	>= 15	5.3	1996	25.6883	35.1842
NA	NA	lu8094	NA	>= 15	9.8	1996	25.6883	35.1842
NA	NA	lu8096	NA	>= 15	44.4	1996	25.6883	35.202
NA	NA	lu8097	NA	>= 15	27.3	1996	25.6883	35.211
NA	NA	lu8099	NA	>= 15	10.5	1996	25.6883	35.2288
NA	NA	lu8159	NA	>= 15	10.5	1994	25.6992	34.8721
NA	NA	lu8177	NA	< 15	23.1	1996	25.6992	35.0326
NA	NA	lu8184	NA	>= 15	33.3	1993	25.6992	35.095
NA	NA	lu8184	NA	>= 15	6.7	1996	25.6992	35.095
NA	NA	lu8185	NA	>= 15	33.3	1993	25.6992	35.104
NA	NA	lu8185	NA	>= 15	15.8	1996	25.6992	35.104
NA	NA	lu8192	NA	>= 15	30.8	1993	25.6992	35.1664
NA	NA	lu8193	NA	>= 15	9.5	1996	25.6992	35.1753
NA	NA	lu8277	NA	>= 15	12.5	1996	25.71	35.0326
NA	NA	lu8281	NA	>= 15	23.5	1996	25.71	35.0683
NA	NA	lu8284	NA	>= 15	40	1996	25.71	35.095
NA	NA	lu8285	NA	< 15	46.2	1996	25.71	35.104
NA	NA	lu8297	NA	>= 15	10	1996	25.71	35.211
NA	NA	lu8359	NA	>= 15	0	1990	25.7209	34.8721
NA	NA	lu8375	NA	>= 15	13.3	1996	25.7209	35.0148
NA	NA	lu8380	NA	< 15	53.8	1996	25.7209	35.0594
NA	NA	lu8382	NA	< 15	46.2	1996	25.7209	35.0772
NA	NA	lu8384	NA	>= 15	23.5	1996	25.7209	35.095
NA	NA	lu8385	NA	< 15	16.7	1996	25.7209	35.104
NA	NA	lu8394	NA	>= 15	38.1	1984	25.7209	35.1842
NA	NA	lu8459	NA	>= 15	0	1990	25.7318	34.8721
NA	NA	lu8459	NA	>= 15	12.1	1990	25.7318	34.8721
NA	NA	lu8459	NA	< 15	0	1990	25.7318	34.8721
NA	NA	lu8459	NA	< 15	0	1994	25.7318	34.8721
NA	NA	lu8478	NA	>= 15	31.8	1996	25.7318	35.0415
NA	NA	lu8486	NA	>= 15	15.8	1996	25.7318	35.1129
NA	NA	lu8486	NA	< 15	23.1	1996	25.7318	35.1129
NA	NA	lv8510	NA	>= 15	3.2	1996	25.7426	35.3269
NA	NA	lu8578	NA	>= 15	0	1996	25.7426	35.0415
NA	NA	lu8599	NA	>= 15	36.7	1996	25.7426	35.2288
NA	NA	lu8678	NA	>= 15	38.5	1996	25.7535	35.0415
NA	NA	lu8680	NA	< 15	16.7	1996	25.7535	35.0594
NA	NA	lu8681	NA	>= 15	20	1996	25.7535	35.0683
NA	NA	lu8687	NA	< 15	29.2	1986	25.7535	35.1218
NA	NA	lu8687	NA	< 15	31	1986	25.7535	35.1218
NA	NA	lu8687	NA	< 15	26	1992	25.7535	35.1218
NA	NA	lu8687	NA	< 15	5.6	1992	25.7535	35.1218
NA	NA	lu8787	NA	< 15	30	1996	25.7644	35.1218
NA	NA	lu8881	NA	>= 15	28.6	1996	25.7752	35.0683
NA	NA	lu8882	NA	>= 15	18.2	1996	25.7752	35.0772
NA	NA	lu8883	NA	>= 15	53.3	1996	25.7752	35.0861
NA	NA	lu8886	NA	< 15	33.3	1996	25.7752	35.1129
NA	NA	lu8976	NA	< 15	50	1996	25.7861	35.0237
NA	NA	lu8977	NA	>= 15	11.1	1996	25.7861	35.0326
NA	NA	lu8978	NA	>= 15	20	1996	25.7861	35.0415
NA	NA	lu8982	NA	>= 15	13.3	1996	25.7861	35.0772
NA	NA	lu8983	NA	< 15	50	1996	25.7861	35.0861
NA	NA	lu8986	NA	>= 15	50	1996	25.7861	35.1129
NA	NA	lu9079	NA	>= 15	37.5	1992	25.797	35.0505
NA	NA	lu9083	NA	>= 15	33.3	1996	25.797	35.0861
NA	NA	lu9085	NA	>= 15	43.7	1993	25.797	35.104
NA	NA	lu9179	NA	>= 15	22.9	1993	25.8079	35.0505
NA	NA	lu9180	NA	>= 15	4.5	1996	25.8079	35.0594
NA	NA	lu9375	NA	>= 15	0	1993	25.8296	35.0148
NA	NA	lu9479	NA	>= 15	71.4	1993	25.8405	35.0505
NA	NA	lu9482	NA	>= 15	17.9	1992	25.8405	35.0772
NA	NA	lu9487	NA	>= 15	47.2	1987	25.8405	35.1218
NA	NA	lu9487	NA	>= 15	60.3	1990	25.8405	35.1218
NA	NA	lu9577	NA	>= 15	36.4	1993	25.8513	35.0326
NA	NA	lu9582	NA	>= 15	21.1	1996	25.8513	35.0772
NA	NA	lu9679	NA	>= 15	15.4	1993	25.8622	35.0505
NA	NA	lu9682	NA	>= 15	45	1996	25.8622	35.0772
NA	NA	lu9683	NA	>= 15	56.3	1993	25.8622	35.0861
NA	NA	lu9687	NA	< 15	21.1	1986	25.8622	35.1218
NA	NA	lu9687	NA	< 15	20	1986	25.8622	35.1218
NA	NA	lu9690	NA	>= 15	23.5	1996	25.8622	35.1485
NA	NA	lu9694	NA	>= 15	24.7	1990	25.8622	35.1842
NA	NA	lu9779	NA	>= 15	19	1996	25.8731	35.0505
NA	NA	lu9783	NA	>= 15	33.3	1996	25.8731	35.0861
NA	NA	lu9786	NA	< 15	19.05	1992	25.8731	35.1129
NA	NA	lu9786	NA	< 15	18.8	1992	25.8731	35.1129
NA	NA	lu9786	NA	< 15	22.2	1992	25.8731	35.1129
NA	NA	lu9876	NA	>= 15	9.1	1993	25.8839	35.0237
NA	NA	lu9878	NA	>= 15	6.3	1996	25.8839	35.0415
NA	NA	lu9883	NA	>= 15	8.3	1996	25.8839	35.0861
NA	NA	lu9885	NA	>= 15	32.1	1987	25.8839	35.104
NA	NA	lu9985	NA	>= 15	35.3	1996	25.8948	35.104
NA	NA	lv0010	NA	>= 15	17.1	1990	24.8187	35.3269
NA	NA	lv0011	NA	>= 15	7.1	1990	24.8187	35.3358
NA	NA	lv0013	NA	>= 15	5.6	1990	24.8187	35.3536
NA	NA	lv0600	NA	>= 15	0	1993	24.8839	35.2377
NA	NA	lv0601	NA	>= 15	12.3	1990	24.8839	35.2466
NA	NA	lv0615	NA	>= 15	15.4	1990	24.8839	35.3715
NA	NA	lv0702	NA	>= 15	20.6	1993	24.8948	35.2555
NA	NA	lv0705	NA	>= 15	28.6	1993	24.8948	35.2823
NA	NA	lv0716	NA	>= 15	26.1	1990	24.8948	35.3804
NA	NA	lv0805	NA	>= 15	0	1993	24.9057	35.2823
NA	NA	lv0806	NA	>= 15	0	1987	24.9057	35.2912
NA	NA	lv0816	NA	>= 15	16.7	1990	24.9057	35.3804
NA	NA	lv0906	NA	>= 15	31.3	1990	24.9166	35.2912
NA	NA	lv0917	NA	>= 15	6.5	1990	24.9166	35.3893
NA	NA	lv0918	NA	>= 15	3	1992	24.9166	35.3982
NA	NA	lv1002	NA	>= 15	26.3	1990	24.9274	35.2555
NA	NA	lv1008	NA	>= 15	13.3	1990	24.9274	35.309
NA	NA	lv1018	NA	>= 15	8.6	1992	24.9274	35.3982
NA	NA	lv1018	NA	>= 15	14.3	1992	24.9274	35.3982
NA	NA	lv1106	NA	>= 15	18.2	1990	24.9383	35.2912
NA	NA	lv1200	NA	>= 15	37	1990	24.9492	35.2377
NA	NA	lv1200	NA	>= 15	48.3	1990	24.9492	35.2377
NA	NA	lv1200	NA	>= 15	29.3	1990	24.9492	35.2377
NA	NA	lv1202	NA	>= 15	22	1990	24.9492	35.2555
NA	NA	lv1217	NA	>= 15	9.1	1990	24.9492	35.3893
NA	NA	lv1301	NA	>= 15	52.9	1990	24.96	35.2466
NA	NA	lv1304	NA	>= 15	21.1	1990	24.96	35.2734
NA	NA	lv1305	NA	>= 15	44.4	1990	24.96	35.2823
NA	NA	lv1401	NA	>= 15	14.3	1990	24.9709	35.2466
NA	NA	lv1408	NA	>= 15	0	1990	24.9709	35.309
NA	NA	lv1518	NA	>= 15	24.1	1990	24.9818	35.3982
NA	NA	lv1706	NA	>= 15	3.6	1990	25.0035	35.2912
NA	NA	lv1715	NA	>= 15	19	1996	25.0035	35.3715
NA	NA	lv1716	NA	>= 15	0	1996	25.0035	35.3804
NA	NA	lv1718	NA	>= 15	20.5	1992	25.0035	35.3982
NA	NA	lv1719	NA	>= 15	17.7	1990	25.0035	35.4071
NA	NA	lv1817	NA	>= 15	10.3	1990	25.0144	35.3893
NA	NA	lv2010	NA	>= 15	0	1990	25.0361	35.3269
NA	NA	lv2014	NA	>= 15	23.4	1993	25.0361	35.3625
NA	NA	lv2015	NA	>= 15	10.5	1990	25.0361	35.3715
NA	NA	lv2015	NA	>= 15	16.7	1993	25.0361	35.3715
NA	NA	lv2205	NA	>= 15	29.3	1990	25.0579	35.2823
NA	NA	lv2212	NA	>= 15	8.3	1990	25.0579	35.3447
NA	NA	lv2213	NA	>= 15	27.5	1992	25.0579	35.3536
NA	NA	lv2700	NA	>= 15	4.5	1990	25.1122	35.2377
NA	NA	lv2803	NA	>= 15	4.3	1990	25.1231	35.2645
NA	NA	lv3523	NA	< 15	45.5	1990	25.1992	35.4428
NA	NA	lv3623	NA	>= 15	3.2	1990	25.21	35.4428
NA	NA	lv3710	NA	>= 15	19.8	1987	25.2209	35.3269
NA	NA	lv3722	NA	>= 15	47.6	1990	25.2209	35.4339
NA	NA	lv3724	NA	< 15	27.3	1990	25.2209	35.4517
NA	NA	lv3724	NA	< 15	0	1990	25.2209	35.4517
NA	NA	lv3728	NA	>= 15	35	1990	25.2209	35.4874
NA	NA	lv3811	NA	>= 15	40	1993	25.2318	35.3358
NA	NA	lv3822	NA	< 15	28.6	1990	25.2318	35.4339
NA	NA	lv3822	NA	< 15	30	1990	25.2318	35.4339
NA	NA	lv3822	NA	< 15	45.5	1990	25.2318	35.4339
NA	NA	lv3823	NA	>= 15	18.2	1987	25.2318	35.4428
NA	NA	lv3823	NA	>= 15	52.6	1990	25.2318	35.4428
NA	NA	lv3824	NA	>= 15	8	1990	25.2318	35.4517
NA	NA	lv3824	NA	< 15	0	1990	25.2318	35.4517
NA	NA	lv3824	NA	>= 15	64.7	1990	25.2318	35.4517
NA	NA	lv3922	NA	>= 15	33.3	1990	25.2426	35.4339
NA	NA	lv3923	NA	< 15	46.2	1987	25.2426	35.4428
NA	NA	lv3923	NA	>= 15	8.7	1990	25.2426	35.4428
NA	NA	lv3923	NA	< 15	30	1990	25.2426	35.4428
NA	NA	lv3924	NA	>= 15	28.6	1990	25.2426	35.4517
NA	NA	lv3924	NA	< 15	0	1990	25.2426	35.4517
NA	NA	lv3924	NA	>= 15	61	1990	25.2426	35.4517
NA	NA	lv3925	NA	>= 15	54.8	1990	25.2426	35.4606
NA	NA	lv4021	NA	>= 15	36.4	1990	25.2535	35.425
NA	NA	lv4022	NA	< 15	38.5	1990	25.2535	35.4339
NA	NA	lv4022	NA	>= 15	35.7	1990	25.2535	35.4339
NA	NA	lv4023	NA	>= 15	50	1987	25.2535	35.4428
NA	NA	lv4024	NA	>= 15	49.2	1990	25.2535	35.4517
NA	NA	lv4123	NA	>= 15	54.1	1987	25.2644	35.4428
NA	NA	lv4124	NA	>= 15	51.6	1990	25.2644	35.4517
NA	NA	lv5000	NA	>= 15	26.3	1992	25.3622	35.2377
NA	NA	lv5010	NA	>= 15	24.7	1993	25.3622	35.3269
NA	NA	lv5103	NA	>= 15	20	1993	25.3731	35.2645
NA	NA	lv5205	NA	>= 15	66.7	1996	25.3839	35.2823
NA	NA	Lv5209	NA	>= 15	12.2	1993	25.3839	35.318
NA	NA	lv5209	NA	>= 15	3	1993	25.3839	35.318
NA	NA	lv5404	NA	>= 15	33.3	1996	25.4057	35.2734
NA	NA	lv5407	NA	>= 15	0	1994	25.4057	35.3001
NA	NA	lv5408	NA	>= 15	10.2	1986	25.4057	35.309
NA	NA	lv5508	NA	>= 15	5.7	1976	25.4166	35.309
NA	NA	LV5508	NA	>= 15	6.8	1986	25.4166	35.309
NA	NA	lv5508	NA	>= 15	17.6	1992	25.4166	35.309
NA	NA	lv5508	NA	>= 15	17.7	1993	25.4166	35.309
NA	NA	lv5603	NA	>= 15	35.5	1996	25.4274	35.2645
NA	NA	lv5605	NA	>= 15	30.8	1993	25.4274	35.2823
NA	NA	lv5606	NA	>= 15	23.1	1993	25.4274	35.2912
NA	NA	lv5800	NA	>= 15	10	1996	25.4492	35.2377
NA	NA	lv5900	NA	>= 15	15	1986	25.46	35.2377
NA	NA	lv5900	NA	>= 15	38.1	1996	25.46	35.2377
NA	NA	lv5902	NA	>= 15	11.8	1996	25.46	35.2555
NA	NA	lv5903	NA	>= 15	15.8	1996	25.46	35.2645
NA	NA	lv6003	NA	>= 15	50	1996	25.4709	35.2645
NA	NA	lv6503	NA	>= 15	17.4	1996	25.5252	35.2645
NA	NA	lv6602	NA	>= 15	5.9	1996	25.5361	35.2555
NA	NA	lv6606	NA	>= 15	20	1992	25.5361	35.2912
NA	NA	lv6607	NA	>= 15	21.2	1993	25.5361	35.3001
NA	NA	lv6608	NA	>= 15	9.3	1994	25.5361	35.309
NA	NA	lv6708	NA	>= 15	0	1996	25.547	35.309
NA	NA	lv6802	NA	>= 15	13.6	1996	25.5579	35.2555
NA	NA	lv6807	NA	>= 15	25	1993	25.5579	35.3001
NA	NA	lv6907	NA	>= 15	26.7	1996	25.5687	35.3001
NA	NA	lv7004	NA	>= 15	50	1996	25.5796	35.2734
NA	NA	lv7107	NA	< 15	11.1	1987	25.5905	35.3001
NA	NA	lv7107	NA	< 15	18.2	1996	25.5905	35.3001
NA	NA	lv7203	NA	>= 15	18.8	1990	25.6013	35.2645
NA	NA	lv7304	NA	>= 15	72.7	1990	25.6122	35.2734
NA	NA	lv7307	NA	>= 15	22.2	1990	25.6122	35.3001
NA	NA	lv7308	NA	>= 15	64.3	1996	25.6122	35.309
NA	NA	lv7400	NA	>= 15	31.3	1986	25.6231	35.2377
NA	NA	lv7400	NA	>= 15	66.7	1996	25.6231	35.2377
NA	NA	lv7410	NA	>= 15	47.4	1990	25.6231	35.3269
NA	NA	lv7410	NA	>= 15	42.6	1996	25.6231	35.3269
NA	NA	lv7505	NA	>= 15	41.2	1990	25.6339	35.2823
NA	NA	lv7605	NA	>= 15	25	1993	25.6448	35.2823
NA	NA	lv7607	NA	>= 15	25	1990	25.6448	35.3001
NA	NA	lv7911	NA	>= 15	27.7	1996	25.6774	35.3358
NA	NA	lv8007	NA	>= 15	30	1992	25.6883	35.3001
NA	NA	lv8007	NA	>= 15	36.4	1992	25.6883	35.3001
NA	NA	lv8009	NA	>= 15	6.4	1993	25.6883	35.318
NA	NA	lv8201	NA	>= 15	17.6	1996	25.71	35.2466
NA	NA	lv8204	NA	>= 15	9.5	1992	25.71	35.2734
NA	NA	lv8208	NA	>= 15	19.6	1986	25.71	35.309
NA	NA	mu0077	NA	>= 15	47.8	1993	25.9057	35.0326
NA	NA	mu0079	NA	>= 15	18.5	1993	25.9057	35.0505
NA	NA	mu0082	NA	>= 15	21.4	1996	25.9057	35.0772
NA	NA	mu0085	NA	>= 15	27.8	1996	25.9057	35.104
NA	NA	mu0086	NA	>= 15	38.3	1996	25.9057	35.1129
NA	NA	mu0090	NA	>= 15	20	1996	25.9057	35.1485
NA	NA	mu0093	NA	>= 15	40	1993	25.9057	35.1753
NA	NA	mu0094	NA	>= 15	44.8	1990	25.9057	35.1842
NA	NA	mu0181	NA	>= 15	48	1996	25.9166	35.0683
NA	NA	mu0182	NA	>= 15	68.6	1996	25.9166	35.0772
NA	NA	mu0183	NA	>= 15	27.3	1996	25.9166	35.0861
NA	NA	mu0193	NA	>= 15	36	1990	25.9166	35.1753
NA	NA	mu0285	NA	>= 15	58.8	1996	25.9274	35.104
NA	NA	mu0290	NA	>= 15	50	1993	25.9274	35.1485
NA	NA	mu0383	NA	>= 15	22.7	1996	25.9383	35.0861
NA	NA	mu0385	NA	< 15	21.4	1996	25.9383	35.104
NA	NA	mu0583	NA	>= 15	11.5	1996	25.96	35.0861
NA	NA	mu0691	NA	>= 15	33.3	1996	25.9709	35.1575
NA	NA	mu0692	NA	>= 15	44.4	1996	25.9709	35.1664
NA	NA	mu0887	NA	>= 15	30.8	1996	25.9926	35.1218
NA	NA	mu0888	NA	>= 15	31.6	1996	25.9926	35.1307
NA	NA	mu0982	NA	>= 15	33.3	1996	26.0035	35.0772
NA	NA	mu0984	NA	>= 15	12.8	1996	26.0035	35.095
NA	NA	mu0985	NA	>= 15	36.4	1996	26.0035	35.104
NA	NA	mu0986	NA	>= 15	25	1990	26.0035	35.1129
NA	NA	mu0988	NA	>= 15	38.1	1996	26.0035	35.1307
NA	NA	mu1075	NA	>= 15	80	1996	26.0144	35.0148
NA	NA	mu1075	NA	>= 15	58.3	1996	26.0144	35.0148
NA	NA	mu1076	NA	>= 15	66.7	1996	26.0144	35.0237
NA	NA	mu1077	NA	>= 15	6.7	1996	26.0144	35.0326
NA	NA	mu1081	NA	>= 15	36.8	1996	26.0144	35.0683
NA	NA	mu1082	NA	>= 15	27.3	1996	26.0144	35.0772
NA	NA	mu1085	NA	>= 15	36.8	1996	26.0144	35.104
NA	NA	mu1086	NA	>= 15	33.3	1996	26.0144	35.1129
NA	NA	mu1087	NA	>= 15	52.6	1996	26.0144	35.1218
NA	NA	mu1088	NA	>= 15	58.3	1996	26.0144	35.1307
NA	NA	mu1094	NA	>= 15	36.4	1996	26.0144	35.1842
NA	NA	mu1096	NA	>= 15	41	1996	26.0144	35.202
NA	NA	mu1175	NA	>= 15	0	1996	26.0252	35.0148
NA	NA	mu1175	NA	>= 15	30	1996	26.0252	35.0148
NA	NA	mu1175	NA	>= 15	30.8	1996	26.0252	35.0148
NA	NA	mu1177	NA	>= 15	52.6	1996	26.0252	35.0326
NA	NA	mu1178	NA	>= 15	42.9	1996	26.0252	35.0415
NA	NA	mu1178	NA	>= 15	28.6	1996	26.0252	35.0415
NA	NA	mu1182	NA	>= 15	25	1996	26.0252	35.0772
NA	NA	mu1183	NA	>= 15	0	1996	26.0252	35.0861
NA	NA	mu1184	NA	>= 15	20	1996	26.0252	35.095
NA	NA	mu1186	NA	>= 15	33.3	1996	26.0252	35.1129
NA	NA	mu1188	NA	>= 15	29.2	1996	26.0252	35.1307
NA	NA	mu1191	NA	>= 15	20	1996	26.0252	35.1575
NA	NA	mu1196	NA	>= 15	50	1996	26.0252	35.202
NA	NA	mu1197	NA	>= 15	18.2	1996	26.0252	35.211
NA	NA	mu1275	NA	>= 15	38.5	1996	26.0361	35.0148
NA	NA	mu1279	NA	>= 15	30.8	1976	26.0361	35.0505
NA	NA	mu1287	NA	>= 15	33.3	1996	26.0361	35.1218
NA	NA	mu1288	NA	>= 15	3.8	1996	26.0361	35.1307
NA	NA	mu1296	NA	< 15	23.1	1996	26.0361	35.202
NA	NA	mu1378	NA	>= 15	32	1996	26.047	35.0415
NA	NA	mu1380	NA	>= 15	49.3	1993	26.047	35.0594
NA	NA	mu1388	NA	>= 15	37.5	1996	26.047	35.1307
NA	NA	mu1391	NA	>= 15	35.3	1996	26.047	35.1575
NA	NA	mu1475	NA	>= 15	52.4	1996	26.0579	35.0148
NA	NA	mu1475	NA	>= 15	66.7	1996	26.0579	35.0148
NA	NA	mu1478	NA	>= 15	12.5	1996	26.0579	35.0415
NA	NA	mu1479	NA	>= 15	45.5	1996	26.0579	35.0505
NA	NA	mu1481	NA	>= 15	42.9	1996	26.0579	35.0683
NA	NA	mu1485	NA	>= 15	14.3	1996	26.0579	35.104
NA	NA	mu1486	NA	>= 15	38.7	1993	26.0579	35.1129
NA	NA	mu1486	NA	>= 15	35.3	1996	26.0579	35.1129
NA	NA	mu1487	NA	>= 15	23.1	1996	26.0579	35.1218
NA	NA	mu1491	NA	>= 15	25	1996	26.0579	35.1575
NA	NA	mu1494	NA	>= 15	38.5	1993	26.0579	35.1842
NA	NA	mu1576	NA	>= 15	46.2	1996	26.0687	35.0237
NA	NA	mu1579	NA	>= 15	46.7	1996	26.0687	35.0505
NA	NA	mu1582	NA	>= 15	18.2	1990	26.0687	35.0772
NA	NA	mu1583	NA	>= 15	23.1	1996	26.0687	35.0861
NA	NA	mu1586	NA	>= 15	47.1	1996	26.0687	35.1129
NA	NA	mu1591	NA	>= 15	47.6	1996	26.0687	35.1575
NA	NA	mu1592	NA	>= 15	53.3	1996	26.0687	35.1664
NA	NA	mu1675	NA	>= 15	72.7	1996	26.0796	35.0148
NA	NA	mu1679	NA	>= 15	64.3	1996	26.0796	35.0505
NA	NA	mu1680	NA	>= 15	31.6	1996	26.0796	35.0594
NA	NA	mu1683	NA	>= 15	18.2	1996	26.0796	35.0861
NA	NA	mu1686	NA	>= 15	35.3	1996	26.0796	35.1129
NA	NA	mu1687	NA	>= 15	33.3	1993	26.0796	35.1218
NA	NA	mu1689	NA	>= 15	40	1996	26.0796	35.1396
NA	NA	mu1690	NA	>= 15	18.2	1996	26.0796	35.1485
NA	NA	mu1692	NA	>= 15	18.8	1996	26.0796	35.1664
NA	NA	mu1695	NA	>= 15	30	1996	26.0796	35.1931
NA	NA	mu1775	NA	>= 15	20	1996	26.0905	35.0148
NA	NA	mu1780	NA	>= 15	9.1	1996	26.0905	35.0594
NA	NA	mu1785	NA	>= 15	16.7	1996	26.0905	35.104
NA	NA	mu1789	NA	>= 15	50	1996	26.0905	35.1396
NA	NA	mu1790	NA	>= 15	28.2	1993	26.0905	35.1485
NA	NA	mu1790	NA	>= 15	36.8	1996	26.0905	35.1485
NA	NA	mu1791	NA	>= 15	41.2	1996	26.0905	35.1575
NA	NA	mu1792	NA	>= 15	30.8	1996	26.0905	35.1664
NA	NA	mu1873	NA	>= 15	26.7	1996	26.1013	34.997
NA	NA	mu1874	NA	>= 15	0	1996	26.1013	35.0059
NA	NA	mu1880	NA	>= 15	25	1996	26.1013	35.0594
NA	NA	mu1882	NA	>= 15	17.1	1990	26.1013	35.0772
NA	NA	mu1882	NA	>= 15	26.3	1996	26.1013	35.0772
NA	NA	mu1884	NA	>= 15	60	1996	26.1013	35.095
NA	NA	mu1885	NA	>= 15	63.6	1996	26.1013	35.104
NA	NA	mu1887	NA	>= 15	40	1996	26.1013	35.1218
NA	NA	mu1888	NA	>= 15	46.7	1996	26.1013	35.1307
NA	NA	mu1891	NA	>= 15	38.5	1996	26.1013	35.1575
NA	NA	mu1893	NA	>= 15	28.6	1976	26.1013	35.1753
NA	NA	mu1894	NA	>= 15	23.1	1996	26.1013	35.1842
NA	NA	mu1896	NA	>= 15	31.3	1990	26.1013	35.202
NA	NA	mu1975	NA	>= 15	5.6	1996	26.1122	35.0148
NA	NA	mu1976	NA	>= 15	7.7	1996	26.1122	35.0237
NA	NA	mu1981	NA	>= 15	42.1	1996	26.1122	35.0683
NA	NA	mu1981	NA	>= 15	22.7	1996	26.1122	35.0683
NA	NA	mu1983	NA	< 15	30.8	1996	26.1122	35.0861
NA	NA	mu1984	NA	>= 15	64.7	1996	26.1122	35.095
NA	NA	mu1987	NA	>= 15	36.4	1996	26.1122	35.1218
NA	NA	mu1988	NA	>= 15	53.8	1996	26.1122	35.1307
NA	NA	mu1989	NA	>= 15	40	1996	26.1122	35.1396
NA	NA	mu1990	NA	>= 15	63.6	1996	26.1122	35.1485
NA	NA	mu1992	NA	>= 15	38.9	1996	26.1122	35.1664
NA	NA	mu2064	NA	>= 15	28.6	1990	26.1231	34.9167
NA	NA	mu2065	NA	>= 15	17	1990	26.1231	34.9256
NA	NA	mu2067	NA	>= 15	9.4	1990	26.1231	34.9435
NA	NA	mu2067	NA	>= 15	16.7	1990	26.1231	34.9435
NA	NA	mu2067	NA	>= 15	17.4	1990	26.1231	34.9435
NA	NA	mu2067	NA	< 15	45.5	1990	26.1231	34.9435
NA	NA	mu2068	NA	>= 15	4.8	1990	26.1231	34.9524
NA	NA	mu2074	NA	>= 15	31.3	1996	26.1231	35.0059
NA	NA	mu2075	NA	>= 15	38.5	1996	26.1231	35.0148
NA	NA	mu2076	NA	>= 15	13.3	1996	26.1231	35.0237
NA	NA	mu2081	NA	>= 15	38.1	1996	26.1231	35.0683
NA	NA	mu2082	NA	>= 15	50	1996	26.1231	35.0772
NA	NA	mu2083	NA	>= 15	46.7	1996	26.1231	35.0861
NA	NA	mu2087	NA	>= 15	27.3	1996	26.1231	35.1218
NA	NA	mu2165	NA	>= 15	19	1990	26.1339	34.9256
NA	NA	mu2165	NA	>= 15	37.5	1990	26.1339	34.9256
NA	NA	mu2165	NA	>= 15	20	1990	26.1339	34.9256
NA	NA	mu2165	NA	< 15	18.2	1990	26.1339	34.9256
NA	NA	mu2166	NA	>= 15	7.8	1990	26.1339	34.9345
NA	NA	mu2166	NA	>= 15	36.4	1990	26.1339	34.9345
NA	NA	mu2166	NA	>= 15	10.5	1990	26.1339	34.9345
NA	NA	mu2168	NA	>= 15	0	1990	26.1339	34.9524
NA	NA	mu2176	NA	>= 15	7.1	1996	26.1339	35.0237
NA	NA	mu2177	NA	>= 15	0	1996	26.1339	35.0326
NA	NA	mu2178	NA	>= 15	7.4	1996	26.1339	35.0415
NA	NA	mu2179	NA	>= 15	18.9	1996	26.1339	35.0505
NA	NA	mu2180	NA	>= 15	15.8	1996	26.1339	35.0594
NA	NA	mu2181	NA	>= 15	30	1996	26.1339	35.0683
NA	NA	mu2184	NA	>= 15	27.8	1996	26.1339	35.095
NA	NA	mu2265	NA	>= 15	12.5	1990	26.1448	34.9256
NA	NA	mu2266	NA	< 15	7.1	1990	26.1448	34.9345
NA	NA	mu2267	NA	>= 15	12.5	1990	26.1448	34.9435
NA	NA	mu2276	NA	>= 15	56.3	1996	26.1448	35.0237
NA	NA	mu2277	NA	>= 15	9.1	1996	26.1448	35.0326
NA	NA	mu2279	NA	>= 15	10	1990	26.1448	35.0505
NA	NA	mu2279	NA	>= 15	47.4	1996	26.1448	35.0505
NA	NA	mu2280	NA	>= 15	26.1	1996	26.1448	35.0594
NA	NA	mu2282	NA	>= 15	25	1996	26.1448	35.0772
NA	NA	mu2283	NA	>= 15	31.6	1996	26.1448	35.0861
NA	NA	mu2284	NA	>= 15	62.5	1996	26.1448	35.095
NA	NA	mu2286	NA	>= 15	15.8	1996	26.1448	35.1129
NA	NA	mu2287	NA	>= 15	43.8	1996	26.1448	35.1218
NA	NA	mu2291	NA	>= 15	11.1	1996	26.1448	35.1575
NA	NA	mu2294	NA	>= 15	10	1996	26.1448	35.1842
NA	NA	mu2366	NA	>= 15	20	1990	26.1557	34.9345
NA	NA	mu2366	NA	< 15	54.5	1990	26.1557	34.9345
NA	NA	mu2379	NA	>= 15	17.8	1990	26.1557	35.0505
NA	NA	mu2381	NA	>= 15	20	1996	26.1557	35.0683
NA	NA	mu2382	NA	>= 15	27.3	1996	26.1557	35.0772
NA	NA	mu2383	NA	>= 15	58.3	1996	26.1557	35.0861
NA	NA	mu2384	NA	>= 15	40	1996	26.1557	35.095
NA	NA	mu2385	NA	>= 15	0	1996	26.1557	35.104
NA	NA	mu2386	NA	>= 15	4.8	1996	26.1557	35.1129
NA	NA	mu2387	NA	>= 15	44.4	1996	26.1557	35.1218
NA	NA	mu2391	NA	>= 15	0	1990	26.1557	35.1575
NA	NA	mu2394	NA	>= 15	45.5	1990	26.1557	35.1842
NA	NA	mu2481	NA	>= 15	40	1996	26.1666	35.0683
NA	NA	mu2482	NA	>= 15	26.3	1996	26.1666	35.0772
NA	NA	mu2483	NA	>= 15	17.6	1996	26.1666	35.0861
NA	NA	mu2484	NA	>= 15	28.6	1996	26.1666	35.095
NA	NA	mu2485	NA	>= 15	40	1996	26.1666	35.104
NA	NA	mu2486	NA	>= 15	40	1996	26.1666	35.1129
NA	NA	mu2488	NA	>= 15	33.3	1996	26.1666	35.1307
NA	NA	mu2494	NA	>= 15	36.4	1996	26.1666	35.1842
NA	NA	mu2579	NA	>= 15	10.7	1990	26.1774	35.0505
NA	NA	mu2582	NA	>= 15	18.5	1996	26.1774	35.0772
NA	NA	mu2583	NA	>= 15	39.5	1996	26.1774	35.0861
NA	NA	mu2584	NA	>= 15	30.2	1996	26.1774	35.095
NA	NA	mu2584	NA	>= 15	54.5	1996	26.1774	35.095
NA	NA	mu2585	NA	< 15	35.7	1996	26.1774	35.104
NA	NA	mu2587	NA	>= 15	9.5	1994	26.1774	35.1218
NA	NA	mu2595	NA	>= 15	0	1986	26.1774	35.1931
NA	NA	mu2595	NA	>= 15	40	1996	26.1774	35.1931
NA	NA	mu2596	NA	>= 15	0	1996	26.1774	35.202
NA	NA	mu2675	NA	>= 15	42.9	1990	26.1883	35.0148
NA	NA	mu2676	NA	>= 15	39.3	1996	26.1883	35.0237
NA	NA	mu2678	NA	>= 15	2.9	1996	26.1883	35.0415
NA	NA	mu2679	NA	>= 15	0	1990	26.1883	35.0505
NA	NA	mu2680	NA	>= 15	19.2	1996	26.1883	35.0594
NA	NA	mu2681	NA	>= 15	21.4	1996	26.1883	35.0683
NA	NA	mu2682	NA	>= 15	18.8	1996	26.1883	35.0772
NA	NA	mu2684	NA	>= 15	33.3	1996	26.1883	35.095
NA	NA	mu2685	NA	>= 15	35	1996	26.1883	35.104
NA	NA	mu2688	NA	>= 15	13.6	1994	26.1883	35.1307
NA	NA	mu2775	NA	>= 15	11.8	1990	26.1992	35.0148
NA	NA	mu2776	NA	>= 15	5.9	1990	26.1992	35.0237
NA	NA	mu2777	NA	>= 15	9.5	1996	26.1992	35.0326
NA	NA	mu2778	NA	>= 15	0	1996	26.1992	35.0415
NA	NA	mu2779	NA	>= 15	0	1990	26.1992	35.0505
NA	NA	mu2780	NA	>= 15	35.7	1996	26.1992	35.0594
NA	NA	mu2781	NA	>= 15	25	1996	26.1992	35.0683
NA	NA	mu2784	NA	>= 15	30	1996	26.1992	35.095
NA	NA	mu2785	NA	>= 15	28.6	1996	26.1992	35.104
NA	NA	mu2788	NA	>= 15	27.3	1994	26.1992	35.1307
NA	NA	mu2791	NA	>= 15	33.3	1994	26.1992	35.1575
NA	NA	mu2796	NA	>= 15	18.2	1996	26.1992	35.202
NA	NA	mu2797	NA	>= 15	26.7	1996	26.1992	35.211
NA	NA	mu2876	NA	>= 15	15.1	1996	26.21	35.0237
NA	NA	mu2878	NA	>= 15	28.6	1990	26.21	35.0415
NA	NA	mu2884	NA	>= 15	41.7	1996	26.21	35.095
NA	NA	mu2885	NA	>= 15	11.8	1996	26.21	35.104
NA	NA	mu2885	NA	>= 15	42.4	1996	26.21	35.104
NA	NA	mu2885	NA	>= 15	57.1	1996	26.21	35.104
NA	NA	mu2888	NA	>= 15	40	1994	26.21	35.1307
NA	NA	mu2892	NA	>= 15	0	1994	26.21	35.1664
NA	NA	mu2899	NA	>= 15	18.2	1990	26.21	35.2288
NA	NA	mu2978	NA	>= 15	24	1996	26.2209	35.0415
NA	NA	mu2979	NA	>= 15	0	1990	26.2209	35.0505
NA	NA	mu2985	NA	>= 15	43.8	1990	26.2209	35.104
NA	NA	mu2985	NA	>= 15	29.4	1996	26.2209	35.104
NA	NA	mu2986	NA	>= 15	25	1994	26.2209	35.1129
NA	NA	mu2987	NA	>= 15	20	1986	26.2209	35.1218
NA	NA	mu2988	NA	>= 15	35	1993	26.2209	35.1307
NA	NA	mu2997	NA	>= 15	10	1990	26.2209	35.211
NA	NA	mu2997	NA	>= 15	0	1993	26.2209	35.211
NA	NA	mu2998	NA	>= 15	30	1993	26.2209	35.2199
NA	NA	mu2999	NA	>= 15	50	1990	26.2209	35.2288
NA	NA	mu3076	NA	>= 15	0	1990	26.2318	35.0237
NA	NA	mu3076	NA	>= 15	6.9	1990	26.2318	35.0237
NA	NA	mu3076	NA	>= 15	24.3	1990	26.2318	35.0237
NA	NA	mu3077	NA	>= 15	22	1990	26.2318	35.0326
NA	NA	mu3078	NA	>= 15	9.1	1990	26.2318	35.0415
NA	NA	mu3083	NA	>= 15	0	1994	26.2318	35.0861
NA	NA	mu3088	NA	>= 15	19	1996	26.2318	35.1307
NA	NA	mu3095	NA	>= 15	35	1976	26.2318	35.1931
NA	NA	mu3095	NA	>= 15	45	1986	26.2318	35.1931
NA	NA	mu3189	NA	>= 15	8.3	1993	26.2426	35.1396
NA	NA	mu3193	NA	>= 15	21.4	1993	26.2426	35.1753
NA	NA	mu3283	NA	>= 15	39.3	1994	26.2535	35.0861
NA	NA	mu3284	NA	>= 15	34.7	1993	26.2535	35.095
NA	NA	mu3288	NA	>= 15	7.7	1996	26.2535	35.1307
NA	NA	mu3291	NA	>= 15	1.8	1994	26.2535	35.1575
NA	NA	mu3294	NA	>= 15	5.6	1986	26.2535	35.1842
NA	NA	mu3384	NA	>= 15	46.7	1990	26.2644	35.095
NA	NA	mu3386	NA	>= 15	25	1996	26.2644	35.1129
NA	NA	mu3387	NA	>= 15	13.3	1996	26.2644	35.1218
NA	NA	mu3387	NA	>= 15	10	1996	26.2644	35.1218
NA	NA	mu3388	NA	>= 15	5	1996	26.2644	35.1307
NA	NA	mu3488	NA	>= 15	15.4	1996	26.2753	35.1307
NA	NA	mu3491	NA	>= 15	0	1994	26.2753	35.1575
NA	NA	mu3492	NA	>= 15	0	1994	26.2753	35.1664
NA	NA	mu3495	NA	>= 15	41.7	1993	26.2753	35.1931
NA	NA	mu3696	NA	>= 15	12.9	1994	26.297	35.202
NA	NA	mv2309	NA	< 15	35.7	1990	26.1557	35.318
NA	NA	mv2409	NA	>= 15	37.3	1990	26.1666	35.318
NA	NA	mv2409	NA	>= 15	29.2	1990	26.1666	35.318
NA	NA	mv2410	NA	>= 15	30.4	1990	26.1666	35.3269
NA	NA	mv2410	NA	>= 15	50	1990	26.1666	35.3269
NA	NA	mv2411	NA	>= 15	41.7	1990	26.1666	35.3358
NA	NA	mv2509	NA	< 15	30	1990	26.1774	35.318
NA	NA	mv2510	NA	>= 15	9.1	1990	26.1774	35.3269
NA	NA	mv2510	NA	>= 15	21.2	1990	26.1774	35.3269
NA	NA	mv2511	NA	>= 15	30.6	1990	26.1774	35.3358
NA	NA	mv2512	NA	>= 15	52.2	1990	26.1774	35.3447
NA	NA	mv2513	NA	>= 15	8.7	1990	26.1774	35.3536
NA	NA	mv2515	NA	>= 15	4.5	1990	26.1774	35.3715
NA	NA	mv2609	NA	>= 15	33.3	1990	26.1883	35.318
NA	NA	mv2610	NA	< 15	7.7	1990	26.1883	35.3269
NA	NA	mv2611	NA	>= 15	26.5	1990	26.1883	35.3358
NA	NA	mv2612	NA	>= 15	40.4	1990	26.1883	35.3447
NA	NA	mv2900	NA	>= 15	31.3	1990	26.2209	35.2377
NA	NA	mv3000	NA	>= 15	0	1990	26.2318	35.2377
NA	NA	mv3001	NA	>= 15	0	1990	26.2318	35.2466
NA	NA	mv3002	NA	>= 15	44.4	1990	26.2318	35.2555
NA	NA	mv3003	NA	>= 15	9.1	1990	26.2318	35.2645
NA	NA	mv3004	NA	>= 15	0	1990	26.2318	35.2734
NA	NA	mv3101	NA	>= 15	0	1990	26.2426	35.2466
NA	NA	mv3103	NA	>= 15	7.1	1990	26.2426	35.2645
NA	NA	mv3104	NA	>= 15	25	1990	26.2426	35.2734
NA	NA	mv3201	NA	>= 15	7.1	1986	26.2535	35.2466
NA	NA	mv3201	NA	>= 15	25	1987	26.2535	35.2466
NA	NA	mv3201	NA	>= 15	50	1993	26.2535	35.2466
NA	NA	mv3204	NA	>= 15	8.3	1990	26.2535	35.2734
NA	NA	mv3302	NA	>= 15	0	1990	26.2644	35.2555
NA	NA	mv3303	NA	>= 15	38.9	1976	26.2644	35.2645
NA	NA	mv3303	NA	>= 15	31	1993	26.2644	35.2645
NA	NA	mv3304	NA	>= 15	32.4	1990	26.2644	35.2734
NA	NA	mv3403	NA	>= 15	18.2	1990	26.2753	35.2645
NA	NA	mv3404	NA	>= 15	30	1990	26.2753	35.2734
NA	NA	mv3505	NA	>= 15	2.1	1990	26.2861	35.2823
NA	NA	mv3505	NA	>= 15	0	1990	26.2861	35.2823
NA	NA	mv3506	NA	>= 15	15.9	1990	26.2861	35.2912
NA	NA	mv3604	NA	>= 15	0	1990	26.297	35.2734
NA	NA	mv3605	NA	>= 15	15.8	1990	26.297	35.2823
NA	NA	mv3606	NA	>= 15	40	1976	26.297	35.2912
NA	NA	mv3606	NA	>= 15	23.7	1990	26.297	35.2912
NA	NA	ku9792	NA	>= 15	6.3	1996	24.7861	35.1664
NA	NA	ku9793	NA	>= 15	4.8	1996	24.7861	35.1753
NA	NA	ku9593	NA	>= 15	46.7	1996	24.7644	35.1753
NA	NA	ku9893	NA	>= 15	26.4	1996	24.797	35.1753
NA	NA	ku9892	NA	>= 15	5	1996	24.797	35.1664
NA	NA	ku9894	NA	>= 15	29.4	1996	24.797	35.1842
NA	NA	ku9894	NA	>= 15	11.1	1996	24.797	35.1842
NA	NA	ku9794	NA	>= 15	46.7	1996	24.7861	35.1842
NA	NA	ku9795	NA	>= 15	22.2	1996	24.7861	35.1931
NA	NA	ku9795	NA	>= 15	32	1996	24.7861	35.1931
NA	NA	ku9795	NA	>= 15	36.4	1996	24.7861	35.1931
NA	NA	ku9796	NA	>= 15	36.4	1996	24.7861	35.202
NA	NA	ku9895	NA	>= 15	11.8	1996	24.797	35.1931
NA	NA	ku9896	NA	>= 15	6.7	1996	24.797	35.202
NA	NA	ku9895	NA	>= 15	36.4	1996	24.797	35.1931
NA	NA	ku9996	NA	>= 15	0	1996	24.8079	35.202
NA	NA	lu0095	NA	>= 15	0	1996	24.8187	35.1931
NA	NA	lu0195	NA	>= 15	5.9	1996	24.8296	35.1931
NA	NA	lu0094	NA	>= 15	17.6	1996	24.8187	35.1842
NA	NA	lu0096	NA	>= 15	9.5	1996	24.8187	35.202
NA	NA	ku9897	NA	>= 15	26.7	1996	24.797	35.211
NA	NA	ku9692	NA	>= 15	18.9	1996	24.7752	35.1664
NA	NA	ku9692	NA	>= 15	10	1996	24.7752	35.1664
NA	NA	ku9693	NA	>= 15	28.6	1996	24.7752	35.1753
NA	NA	ku9693	NA	>= 15	47.2	1996	24.7752	35.1753
NA	NA	ku9694	NA	>= 15	54.5	1996	24.7752	35.1842
NA	NA	ku9594	NA	>= 15	23.8	1996	24.7644	35.1842
NA	NA	ku9494	NA	>= 15	43.8	1996	24.7535	35.1842
NA	NA	ku9493	NA	>= 15	20.8	1996	24.7535	35.1753
NA	NA	ku9496	NA	>= 15	14.3	1996	24.7535	35.202
NA	NA	ku9496	NA	>= 15	12.5	1996	24.7535	35.202
NA	NA	ku9596	NA	>= 15	23.8	1996	24.7644	35.202
NA	NA	ku9595	NA	>= 15	23.1	1996	24.7644	35.1931
NA	NA	ku9695	NA	>= 15	31.9	1996	24.7752	35.1931
NA	NA	ku9695	NA	>= 15	23.1	1996	24.7752	35.1931
NA	NA	ku9695	NA	>= 15	34.5	1996	24.7752	35.1931
NA	NA	ku9696	NA	>= 15	20	1996	24.7752	35.202
NA	NA	ku9697	NA	>= 15	4.4	1996	24.7752	35.211
NA	NA	ku9598	NA	>= 15	0	1996	24.7644	35.2199
NA	NA	ku9598	NA	>= 15	30.4	1996	24.7644	35.2199
NA	NA	ku9499	NA	>= 15	0	1996	24.7535	35.2288
NA	NA	ku9399	NA	>= 15	25	1996	24.7426	35.2288
NA	NA	kv9300	NA	>= 15	47.6	1996	24.7426	35.2377
NA	NA	kv9301	NA	>= 15	36.4	1996	24.7426	35.2466
NA	NA	kv9201	NA	>= 15	35.7	1996	24.7318	35.2466
NA	NA	kv9200	NA	>= 15	45	1996	24.7318	35.2377
NA	NA	kv9101	NA	>= 15	40	1996	24.7209	35.2466
NA	NA	kv9001	NA	>= 15	36.4	1996	24.71	35.2466
NA	NA	kv8902	NA	>= 15	39.3	1996	24.6992	35.2555
A. teres vermiculata	320	MU1587	54	>= 15	0.148148	1992	26.0687	35.1218
A. teres vermiculata	25	MU3284	50	>= 15	0.08	1988	26.2535	35.095
A. teres XXX		LU3773	114	>= 15	21.0526	No year	25.2209	34.997
A. teres xerocampensis	20	MU2977	55	>= 15	10.9091	1988	26.2209	35.0326
A. teres nordsiecki	620	MU0083	90	>= 15	0	1988	25.9057	35.0861
A. teres moplotuensis	95	MV2901	50	>= 15	16	1992	26.2209	35.2466
A. teres moplotuensis	30	MV2901	35	>= 15	8.57143	1992	26.2209	35.2466
A. teres moplotuensis	40	MV2901	52	>= 15	9.61538	1992	26.2209	35.2466
A. corrugata alada	560	LU5486	111	>= 15	4.5045	1992	25.4057	35.1129
A. corrugata alada	595	LU5486	134	>= 15	0.746269	1992	25.4057	35.1129
A. corrugata alada	550	LU5486	73	>= 15	1.36986	1992	25.4057	35.1129
A. corrugata corrugata	580	LU5091	47	>= 15	0	1992	25.3622	35.1575
A. corrugata corrugata	760	LU5290	40	>= 15	10	1992	25.3839	35.1485
A. corrugata corrugata	300	LU3175	92	>= 15	1.08696	1991	25.1557	35.0148
A. corrugata corrugata	420	LU0474	35	>= 15	28.5714	1990	24.8622	35.0059
A. corrugata corrugata	620	LU2973	33	>= 15	18.1818	1991	25.1339	34.997
A. corrugata corrugata	650	LU3273	55	>= 15	9.09091	1991	25.1666	34.997
A. corrugata corrugata	200	LV4706	14	< 15	0	1991	25.3296	35.2912
A. corrugata corrugata	1150	LU6190	17	>= 15	17.6471	1996	25.4818	35.1485
A. corrugata corrugata	970	LU3773	51	>= 15	13.7255	1991	25.2209	34.997
A. corrugata corrugata	360	LU7691	26	>= 15	3.84615	1986	25.6448	35.1575
A. corrugata corrugata	510	LU3198	19	>= 15	5.26316	1990	25.1557	35.2199
A. corrugata corrugata	300	LU7691	13	< 15	0	1986	25.6448	35.1575
A. corrugata corrugata	430	LU1270	19	>= 15	42.1053	1990	24.9492	34.9702
A. corrugata corrugata	200	LV4706	23	>= 15	0	1990	25.3296	35.2912
A. corrugata corrugata	450	LU0473	21	>= 15	19.0476	1990	24.8622	34.997
A. corrugata corrugata	500	LU1271	21	>= 15	52.381	1990	24.9492	34.9791
A. corrugata corrugata	450	LV7708	48	>= 15	2.08333	1988	25.6557	35.309
A. corrugata corrugata	450	LU5999	29	>= 15	10.3448	1988	25.46	35.2288
A. corrugata corrugata	600	LU6099	27	>= 15	3.7037	1988	25.4709	35.2288
A. corrugata corrugata	1500	LU6398	24	>= 15	29.1667	1988	25.5035	35.2199
A. corrugata corrugata	1050	LU6297	23	>= 15	4.34783	1988	25.4926	35.211
A. corrugata corrugata	1200	LU6789	37	>= 15	27.027	1988	25.547	35.1396
A. corrugata corrugata	950	LU6298	30	>= 15	20	1988	25.4926	35.2199
A. corrugata corrugata	960	LU6596	19	>= 15	52.6316	1986	25.5252	35.202
A. corrugata turgida	460	LU7494	16	>= 15	68.75	1986	25.6231	35.1842
A. corrugata turgida	520	LU7888	42	>= 15	0	1992	25.6666	35.1307
A. corrugata inflata		LV3611	34	>= 15	26.4706	1974	25.21	35.3358
A. corrugata turgida	640	LU7495	23	>= 15	0	1988	25.6231	35.1931
A. corrugata turgida	540	LU7888	83	>= 15	13.253	1992	25.6666	35.1307
A. corrugata inflata	300	LU1183	26	>= 15	23.0769	1990	24.9383	35.0861
A. corrugata inflata	360	LU4298	26	>= 15	3.84615	1991	25.2752	35.2199
A. corrugata inflata	350	LU4297	32	>= 15	0	1991	25.2752	35.211
A. corrugata inflata	50	LV3610	68	>= 15	19.1176	No year	25.21	35.3269
A. corrugata inflata	100	LV3207	49	>= 15	0	1988	25.1666	35.3001
A. maltzani	100	LV7007	25	>= 15	16	1987	25.5796	35.3001
A. maltzani	150	LV7107	29	>= 15	62.069	1987	25.5905	35.3001
A. maltzani	250	LV7910	89	>= 15	1.1236	1988	25.6774	35.3269
A. maltzani	300	LV7208	79	>= 15	11.3924	1987	25.6013	35.309
A. maltzani	400	LV7905	14	< 15	78.5714	1987	25.6774	35.2823
A. maltzani	580	LV7708	10	< 15	20	1988	25.6557	35.309
A. maltzani	480	LV7503	13	< 15	0	1988	25.6339	35.2645
A. maltzani	450	LV7708	6	< 15	16.6667	1988	25.6557	35.309
A. rebelli (las dos)	50	LU9488	168	>= 15	21.4286	1988	25.8405	35.1307
A. praeclara rudis		LU8090	33	>= 15	6.06061	No year	25.6883	35.1485
A. praeclara rudis	20	LU8394	18	>= 15	16.6667	1987	25.7209	35.1842
A. praeclara drakakisi	350	LU8283	20	>= 15	50	1986	25.71	35.0861
A. praeclara drakakisi	50	LU9488	29	>= 15	17.2414	1988	25.8405	35.1307
A. praeclara drakakisi	470	LU7884	20	>= 15	25	1986	25.6666	35.095
A. praeclara drakakisi	500	LU7883	15	>= 15	20	1986	25.6666	35.0861
A. praeclara drakakisi	20	LU8886	18	>= 15	5.55556	1986	25.7752	35.1129
A. praeclara drakakisi	540	MU0685	18	>= 15	5.55556	1988	25.9709	35.104
A. praeclara drakakisi	380	LU8084	15	>= 15	53.3333	1987	25.6883	35.095
A. praeclara drakakisi	110	LU8385	16	>= 15	50	1986	25.7209	35.104
A. praeclara clarissima		LV5000	13	< 15	0	1984	25.3622	35.2377
A. praeclara praeclara	10	LU8487	13	< 15	15.3846	1986	25.7318	35.1218
A. praeclara parallelifera	220	LV4106	17	>= 15	11.7647	1991	25.2644	35.2912
A. praeclara parallelifera	320	LU4098	26	>= 15	0	No year	25.2535	35.2199
A. praeclara parallelifera	100	LV3207	22	>= 15	4.54545	1988	25.1666	35.3001
A. praeclara parallelifera	290	LU3999	23	>= 15	4.34783	No year	25.2426	35.2288
A. praeclara parallelifera	160	LV3306	21	>= 15	0	1988	25.1774	35.2912
A. praeclara parallelifera	1070	LU5588	99	>= 15	0	1992	25.4166	35.1307
A. praeclara praeclara	540	LU7888	10	< 15	40	1992	25.6666	35.1307
A. praeclara praeclara	430	LU7887	17	>= 15	29.4118	1992	25.6666	35.1218
A. praeclara praeclara	500	LV8007	22	>= 15	36.3636	1987	25.6883	35.3001
A. praeclara praeclara	440	LU7886	60	>= 15	1.66667	1992	25.6666	35.1129
A. praeclara praeclara	850	LU6293	55	>= 15	23.6364	1988	25.4926	35.1753
A. praeclara praeclara	80	LU8377	25	>= 15	28	1989	25.7209	35.0326
A. praeclara praeclara	100	LU8197	24	>= 15	16.6667	1987	25.6992	35.211
A. praeclara praeclara	50	LU8177	29	>= 15	20.6897	1989	25.6992	35.0326
A. praeclara parallelifera	180	LV4706	11	< 15	0	1991	25.3296	35.2912
A. praeclara drakakisi	5	LU8886	14	< 15	21.4286	1989	25.7752	35.1129
A. leonisorum	540	LU7888	59	>= 15	20.339	1992	25.6666	35.1307
A. leonisorum	540	LU7888	11	< 15	27.2727	1992	25.6666	35.1307
A. leonisorum	440	LU7886	56	>= 15	14.2857	1992	25.6666	35.1129
A. leonisorum	380	LU8084	49	>= 15	24.4898	1987	25.6883	35.095
A. spratti	600	LV1512	25	>= 15	16	No year	24.9818	35.3447
A. spratti		LV0108	6	< 15	0	1990	24.8296	35.309
A. spratti	410	LV1612	7	< 15	0	1988	24.9926	35.3447
A. spratti	370	LV1612	5	< 15	60	1988	24.9926	35.3447
A. spratti	40	KV9117	82	>= 15	15.8537	1991	24.7209	35.3893
A. moreletiana	25	LV8407	49	>= 15	0	1987	25.7318	35.3001
A. moreletiana	160	LV8407	20	>= 15	5	1987	25.7318	35.3001
A. christae	20	LV8407	13	< 15	30.7692	1996	25.7318	35.3001
A. christae	150	LV8307	43	>= 15	4.65116	1990	25.7209	35.3001
A. moreletiana	10	LV8402	15	>= 15	0	1987	25.7318	35.2555
A. moreletiana	20	LV8407	11	< 15	0	1996	25.7318	35.3001
A. moreletiana	10	LV8506	39	>= 15	2.5641	1988	25.7426	35.2912
A. moreletiana		LV8709	32	>= 15	0	1988	25.7644	35.318
A. moreletiana	180	LU8499	37	>= 15	0	1987	25.7318	35.2288
A. moreletiana	20	LV8602	25	>= 15	0	1988	25.7535	35.2555
A. spratti	750	LV0906	12	< 15	0	1988	24.9166	35.2912
A. hippolyti aphrodite	750	LV1605	31	>= 15	9.67742	No year	24.9926	35.2823
A. hippolyti aphrodite	410	LU3488	69	>= 15	26.087	No year	25.1883	35.1307
A. hippolyti aphrodite	430	LV1407	44	>= 15	34.0909	1991	24.9709	35.3001
A. hippolyti aphrodite	500	LV1010	30	>= 15	53.3333	1990	24.9274	35.3269
A. hippolyti aphrodite	690	LV1405	27	>= 15	11.1111	1990	24.9709	35.2823
A. hippolyti aphrodite	520	LV1509	33	>= 15	36.3636	1991	24.9818	35.318
A. hippolyti aphrodite	580	LV0809	23	>= 15	8.69565	1988	24.9057	35.318
A. hippolyti aphrodite	460	LV1507	23	>= 15	0	1991	24.9818	35.3001
A. hippolyti aphrodite	400	LV1507	18	>= 15	0	1988	24.9818	35.3001
A. hippolyti aphrodite	600	LV1405	12	< 15	50	1991	24.9709	35.2823
A. hippolyti aphrodite		LU2598	32	>= 15	0	No year	25.0905	35.2199
A. hippolyti aphrodite	460	LV1407	57	>= 15	24.5614	1991	24.9709	35.3001
A. hippolyti aphrodite	650	LV1405	26	>= 15	19.2308	1991	24.9709	35.2823
A. hippolyti aphrodite	415	LV1407	41	>= 15	2.43902	1988	24.9709	35.3001
A. hippolyti aphrodite	570	LV1405	22	>= 15	13.6364	1991	24.9709	35.2823
A. hippolyti aphrodite	530	LV1603	45	>= 15	31.1111	1991	24.9926	35.2645
A. hippolyti asterousea		LU0372	47	>= 15	17.0213	No year	24.8513	34.988
A. hippolyti arthuriana	150	LV7107	71	>= 15	18.3099	No year	25.5905	35.3001
A. hippolyti arthuriana	180	LU8499	38	>= 15	42.1053	1987	25.7318	35.2288
A. hippolyti arthuriana	175	LV7310	88	>= 15	25	1987	25.6122	35.3269
A. hippolyti arthuriana	160	LV7004	49	>= 15	40.8163	1992	25.5796	35.2734
A. hippolyti arthuriana	240	LV7105	30	>= 15	26.6667	1991	25.5905	35.2823
A. hippolyti hippolyti	300	LV1612	61	>= 15	40.9836	No year	24.9926	35.3447
